## 27 **Abstract**

28 Mosquitoes are important vectors of disease and require sources of carbohydrates for  
29 reproduction and survival. Unlike host-related behaviors of mosquitoes, comparatively  
30 less is understood about the mechanisms involved in nectar-feeding decisions, or how  
31 this sensory information is processed in the mosquito brain. Here we show that *Aedes*  
32 spp. mosquitoes, including *Aedes aegypti*, are effective pollinators of the *Platanthera*  
33 *obtusata* orchid, and demonstrate this mutualism is mediated by the orchid's scent and  
34 the balance of excitation and inhibition in the mosquito's antennal lobe (AL). The *P.*  
35 *obtusata* orchid emits an attractive, nonanal-rich scent, whereas related *Platanthera*  
36 species – not visited by mosquitoes – emit scents dominated by lilac aldehyde. Calcium  
37 imaging experiments in the mosquito AL revealed that nonanal and lilac aldehyde each  
38 respectively activate the LC2 and AM2 glomerulus, and remarkably, the AM2 glomerulus  
39 is also sensitive to DEET, a mosquito repellent. Lateral inhibition between these two  
40 glomeruli reflects the level of attraction to the orchid scents: whereas the enriched  
41 nonanal scent of *P. obtusata* activates the LC2 and suppresses AM2, the high level of  
42 lilac aldehyde in the other orchid scents inverts this pattern of glomerular activity, and  
43 behavioral attraction is lost. These results demonstrate the ecological importance of  
44 mosquitoes beyond operating as disease vectors and open the door towards  
45 understanding the neural basis of mosquito nectar-seeking behaviors.

46

## 47 **Significance Statement**

48 Nectar-feeding by mosquitoes is important for survival and reproduction, and hence  
49 disease transmission. However, we know little about the sensory mechanisms that  
50 mediate mosquito attraction to sources of nectar, like those of flowers, or how this  
51 information is processed in the mosquito brain. Using a unique mutualism between  
52 *Aedes* mosquitoes and *Platanthera obtusata* orchids, we reveal that this mutualism is  
53 mediated by the orchid's scent. Furthermore, lateral inhibition in the mosquito's antennal  
54 (olfactory) lobe – via the neurotransmitter GABA – is critical for the representation of the  
55 scent. These results have implications toward understanding the olfactory basis of  
56 mosquito-nectar-seeking behaviors.

57

58

59

## 60 Introduction

61

62 Mosquitoes are important vectors of disease, such as dengue, malaria or Zika, and are  
63 considered one of the deadliest animal on earth (1); for this reason, research has largely  
64 focused on mosquito-host interactions, and in particular, the mosquito's sensory  
65 responses to those hosts (2-6). Nectar feeding is one such aspect of mosquito sensory  
66 biology that has received comparatively less attention, despite being an excellent system  
67 in which to probe the neural bases of behavior (7). For instance, nectar- and sugar-  
68 feeding is critically important for both male and female mosquitoes, serving to increase  
69 their lifespan, survival rate, and reproduction, and for males it is required for survival  
70 (7,8).

71 Mosquitoes are attracted to, and feed from, a variety of plant nectar sources,  
72 including those from flowers (9-13). Although most examples of mosquito-plant  
73 interactions have shown that mosquitoes contribute little in reproductive services to the  
74 plant (14), there are examples of mosquitoes being potential pollinators (10,11,15-18).  
75 However, few studies have identified the floral cues that serve to attract and mediate  
76 these decisions by the mosquitoes, and how these behaviors influence pollination.

77 The association between the *Platanthera obtusata* orchid and *Aedes* mosquitoes  
78 is one of the few examples that shows mosquitoes as effective pollinators (15-18), and  
79 thus provides investigators a unique opportunity to identify the sensory mechanisms that  
80 help mosquitoes locate sources of nectar. The genus *Platanthera* has many different  
81 orchid species having diverse morphologies and specialized associations with certain  
82 pollinators (see *SI Appendix*, Table S1), with *P. obtusata* being an exemplar with its  
83 association with mosquitoes (15-18). Although mosquito visitation has been described in  
84 this species (16), the cues that attract mosquitoes to the flowers, and the importance of  
85 mosquito visitation for orchid pollination, are unknown.

86 In this article, we examine the neural and behavioral processes mediating  
87 mosquito floral preference. We present findings from (i) pollination studies in *P. obtusata*  
88 by *Aedes* mosquitoes, (ii) analyses of floral scent compounds that attract diverse  
89 mosquito species, and (iii) antennal and antennal lobe (AL) recordings showing how  
90 these floral scents and compounds are represented in the mosquito brain (Fig. S1).  
91 Using this integrative approach, we demonstrate that *Aedes* discrimination of  
92 *Platanthera* orchids is mediated by the balance of excitation and inhibition in the  
93 mosquito antennal lobe.

94

## 95 Results

96

97 To understand the importance of various pollinators, including mosquitoes, on *P.*  
98 *obtusata*, we first conducted pollinator observation and exclusion experiments in northern  
99 Washington State where *Platanthera* orchids and mosquitoes are abundant. Using a

100 combination of video recordings and focal observations by trained participants, more than  
101 581 *P. obtusata* flowers were observed for a total of 47 h, with 57 floral feeding events by  
102 mosquitoes. During our observations, flowers were almost solely visited by various  
103 mosquito species (both sexes) that mainly belonged to the *Aedes* group (Fig. 1A,B; Table  
104 S2), with the only other visitor being a single geometrid moth. Mosquitoes quickly located  
105 these rather inconspicuous flowers, even on plants that were bagged and thus lacked a  
106 visual display. After landing on the flower, the mosquito's probing of the nectar spur  
107 resulted in pollinia attachment to its eyes (Fig. 1A; Movies S1,2). Most of the pollinia-  
108 bearing mosquitoes had one or two pollinia, but we found up to four pollinia on a single  
109 female. To assess the impact of the mosquitoes' visits on the orchid fruit set, we  
110 conducted a series of pollination experiments, such as bagging (thus preventing mosquito  
111 visitations) and cross- and self-pollinating the plants. We found significantly higher fruit-to-  
112 flower ratios and seed sets in unbagged plants compared with those in bagged or self-  
113 pollinated plants (Figs. 1C, S2; Mann-Whitney Test,  $p < 0.001$ ), and elevated fruit ratios in  
114 our cross-pollinated plants compared with bagged or self-pollinated plants (Fig. 1C). We  
115 then released field-caught mosquitoes into cages containing either a single plant or 2–3  
116 plants (Fig. 1C,D). Once released into the cages, the mosquitoes fed from the *P. obtusata*  
117 flowers, and approximately 10% of the mosquitoes showed pollinia attachment (Fig. 1D).  
118 There was a trend for cages with two or more plants to have higher fruit-to-flower ratios  
119 than those with one plant (Mann-Whitney Test,  $p = 0.07$ ). Cages containing two or more  
120 plants had significantly higher fruit-to-flower ratios than bagged plants (Mann-Whitney  
121 Test,  $p < 0.001$ ), but were not statistically different from the unbagged plants (Mann-  
122 Whitney Test,  $p = 0.84$ ), further suggesting that cross-pollination is important in this orchid  
123 species.

124

## 125 ***Platanthera* orchids differ in their floral scents**

126 *Platanthera obtusata* has a short (~12 cm) inflorescence (Fig. 1A), and flowers emit a  
127 faint grassy- and musky-type of scent. The height and green coloration of the flowers  
128 make this plant difficult to pick out from neighboring vegetation, but over the course of our  
129 observations we noticed that mosquitoes readily oriented and flew to the flowers,  
130 exhibiting a zig-zagging flight typical of odor-conditioned optomotor anemotaxis (6).  
131 Moreover, even when the plants were bagged (thereby preventing the visual display of  
132 the flowers) mosquitoes would still land and attempt to probe the plants through the bag.

133 In the *Platanthera* genus, species differ in their floral advertisements, including  
134 their scent, and this is reflected in the different pollinators visiting each orchid species  
135 (Table S1). Often these species can co-occur in the same sedge, such as *P. obtusata*, *P.*  
136 *stricta*, *P. dilatata* and *P. huronensis*, although hybridization can be low (19,20).  
137 Mosquitoes have sensitive olfactory systems that are used to locate important nutrient  
138 sources, including nectar (2-5, 12). Our observations on the strength of the association  
139 between *P. obtusata* and the mosquitoes, and how mosquitoes were able to locate the *P.*

140 *obtusata* orchids, motivated us to examine the scent of closely related *Platanthera*  
141 species and identify the putative volatiles that mosquitoes might be using to detect and  
142 discriminate between the different orchid species.

143 The floral scents of the six orchid species were collected and subsequently  
144 characterized using gas chromatography with mass spectrometry (Fig. 1E). These  
145 analyses showed that species differed in both scent emissions and compositions (Fig.  
146 1E,F; Table S3; composition: ANOSIM,  $R=0.25$ ,  $p=0.001$ ; emission rate: Student t-tests,  
147  $p<0.05$ ). Mosquito-pollinated *P. obtusata* flowers predominantly emitted nonanal and  
148 octanal, whereas the other orchid species, which are pollinated by other insect taxa  
149 (Table S1), emitted scents that were enriched in terpene compounds, such as lilac  
150 aldehyde (e.g., *P. dilatata*, *P. huronensis*, and *P. stricta*), or aromatic compounds, such  
151 as phenylacetaldehyde (e.g., *P. yosemitensis*).

152

### 153 ***Divergent mosquitoes show similar antennal and behavioral responses to the P.*** 154 ***obtusata* orchid scent**

155 To identify volatile compounds that mosquitoes might use to detect the plants, we  
156 performed gas chromatography coupled with electroantennographic detection (GC-EADs)  
157 using various species of mosquitoes that visit *P. obtusata* flowers in the field (Table S2).  
158 Several chemicals evoked antennal responses in the *Aedes* mosquitoes, including  
159 aliphatic (nonanal and octanal) and terpenoid compounds (e.g., lilac aldehydes,  
160 camphene and  $\alpha$ - and  $\beta$ -pinene) (Figs. 2A, S3). For example, across the *Aedes*-  
161 *Ochlerotatus* group, nonanal elicited consistent responses and one of the strongest  
162 relative responses within a given mosquito species (Figs. 2A, S3). Interestingly, *Culiseta*  
163 mosquitoes, which also visited *P. obtusata* but did not have pollinia attachment, showed  
164 very little response to nonanal. Although mosquito species showed differences in their  
165 response magnitude to the chemicals (Figs. 2A, S3), the responses were relatively  
166 consistent which was reflected in their overlapping distribution in multivariate (Principal  
167 Components Analysis) space (ANOSIM,  $R = 0.076$ ,  $P = 0.166$ )(Fig. 2B). This similarity in  
168 evoked responses by *Aedes* mosquitoes led us to examine whether these chemicals also  
169 evoked similar responses in other mosquitoes. We thus used two species of mosquitoes  
170 that are not native to the area, but are closely (*Ae. aegypti*) or distantly (*Anopheles*  
171 *stephensi*) related to the other *Aedes* species. The non-native mosquitoes (*Ae. aegypti*  
172 and *An. stephensi*) also responded to these volatiles and were not significantly different in  
173 their responses to the other *Aedes* species (ANOSIM,  $R = 0.087$ ,  $p = 0.09$ )(Fig. 2B).

174 *P. obtusata* occurs in sympatry with *P. huronensis*, *P. dilatata* and *P. stricta*, but  
175 we did not observe *Aedes* mosquitoes visiting these orchids. To examine whether these  
176 differences in orchid visitation arise from differences in antennal responses, we  
177 performed GC-EADs using the scents of *P. stricta* and *P. huronensis*, which are  
178 predominantly pollinated by bees, moths, and butterflies (Table S1). Results showed that  
179 the mosquitoes (*Ae. increpitus*, *Ae. communis*, *Ae. canadensis*, and *Culiseta* sp.), which

180 co-exist with these orchids in the same habitat, all responded to several compounds,  
181 including linalool, nonanal, benzaldehyde,  $\beta$ -myrcene and lilac aldehydes (Fig. 2). In  
182 particular, the high concentration of lilac aldehydes in the scent of *P. stricta*, and to a  
183 lesser extent in *P. huronensis*, elicited relatively strong responses in the antennae of *Ae.*  
184 *increditus* and *Ae. communis*. Despite occurring in sympatry and overlapping in their  
185 scent composition, mosquito antennal responses to the three different orchid scents were  
186 significantly different from one another (Fig. 2B; ANOSIM,  $R = 0.137$ ,  $p < 0.01$ ),  
187 suggesting that the orchid species pollinated by other insects were activating distinct  
188 olfactory channels in the mosquitoes.

189 To evaluate if the *P. obtusata* orchid scent attracts mosquitoes, we tested the  
190 behavior of *Ae. increditus* and *Ae. communis* mosquitoes (both important pollinators of *P.*  
191 *obtusata*) in response to the scent emitted by live *P. obtusata* flowers, as well as by an  
192 artificial mixture composed of the floral volatiles that elicited strong antennal responses in  
193 mosquitoes. Both the artificial mixture and the scent from the flowers significantly  
194 attracted these mosquitoes (Fig. 2C; binomial tests:  $p < 0.05$ ). However, upon removal of  
195 lilac aldehyde (~5.4 ng) from the mixture emissions, the attraction was reduced (binomial  
196 test:  $p = 0.292$ ).

197 The similarity between mosquito species in their antennal responses to volatiles in  
198 the *P. obtusata* scent (Fig. 2) raised the question of whether closely related (*Ae. aegypti*)  
199 and more distantly related (*An. stephensi*) mosquitoes might also be attracted to the  
200 orchid scent. When tested in the olfactometer, both *Ae. aegypti* and *An. stephensi*  
201 mosquitoes exhibited significant attraction to the orchid scent with the lilac aldehydes  
202 (binomial tests:  $p < 0.05$ ). By contrast, and similar to responses by *Aedes* mosquitoes,  
203 once the lilac aldehydes were removed from the mixture this attraction was reduced to  
204 levels approaching the mineral oil (no odor) control (Fig. 2C). Nonetheless, the attraction  
205 by these other mosquito species may not indicate that pollinia also attaches to their eyes,  
206 or that they may serve as pollinators. To address this question, we released both male  
207 and female *Ae. aegypti* mosquitoes into cages with flowering *P. obtusata* plants. Once  
208 entering the cage, the mosquitoes immediately fed from the flowers, and pollinia attached  
209 to their eyes similar to the other *Aedes* species (Fig. S4).

210

### 211 ***The P. obtusata orchid scent evokes strong responses in the mosquito antennal*** 212 ***lobe***

213 The differences in floral scents between the orchid species, and the behavioral responses  
214 by different mosquito species to the *P. obtusata* scent, raised the question of how this  
215 chemical information was represented in the mosquito's primary olfactory center, the  
216 antennal lobe (AL). Therefore, we used bath application of a calcium indicator (Fluo4) in  
217 *Ae. increditus* and our *PUB-GCaMP6s* line of *Ae. aegypti* mosquitoes (21,22). Although  
218 both indicators of calcium (Fluo4 and *PUB-GCaMP6s*) do not allow explicit recording of  
219 specific cell types in the AL, but they do provide an ability to record and characterize the



220 responses of individual glomeruli to odor stimuli. Mosquitoes were glued to holders that  
221 permitted two-photon imaging of calcium responses in the AL during tethered flight  
222 (22,23) and tentative registration and naming of glomeruli (Fig. 3A,B). For both mosquito  
223 species, odor stimulation evoked distinct calcium dynamics in the glomerular regions of  
224 the AL that were time-locked to stimulus onset (Fig. 3C,D,G). The orchid mixture evoked  
225 flight responses and strong (>20%  $\Delta F/F$ ) multi-glomerular patterns of activity in both  
226 mosquito species, particularly in the anterior-medial glomeruli (the putative AM2, AM3,  
227 and V1 glomeruli) and the anterior-lateral glomeruli (AL3, and LC2) (Figs. 3D,G; S5, S6).  
228 In addition, certain odorants elicited overlapping patterns of glomerular activity similar to  
229 those elicited by the orchid scent (Fig. 3F,I), such as nonanal in the AL3 and LC2  
230 glomeruli (Fig. 3D,G), with the LC2 glomerulus showing the strongest tuning to nonanal,  
231 octanal, and 1-octanol (Fig. 3E,H). Although the anterior-medial glomeruli showed  
232 broader tuning in *Ae. increpitus* than in *Ae. aegypti*, these glomeruli were sensitive to  
233 terpene compounds in both species and the AM2 glomerulus often exhibited inhibition  
234 when stimulated with nonanal (Figs. 3D,E,G, and H; S5, S6). Interestingly, the AM2  
235 glomerulus showed the strongest tuning to lilac aldehyde, followed by DEET, a strong  
236 mosquito repellent (24-27)(Fig. S7), although these responses were suppressed when  
237 stimulated with the orchid mixture (Figs. 3G,H; S6). However, other odor stimuli, including  
238 human scent, evoked a dissimilar pattern of glomerular activity compared with the orchid  
239 mixture (Fig. 3F,I).

240

### 241 ***Inhibition in the mosquito AL plays an important role in the processing of the*** 242 ***orchid scents***

243 Results from our calcium imaging and behavioral experiments suggested that certain  
244 volatile compounds, such as nonanal and lilac aldehyde, are particularly important for  
245 mosquito responses to *P. obtusata*. However, other *Platanthera* species, that are  
246 primarily pollinated by different insects, also emit these volatile compounds, but at  
247 different ratios (Fig. 4A), therefore raising the question of how mosquitoes respond to  
248 these scents. Behaviorally testing the scents of the moth- and bee-pollinated *Platanthera*  
249 orchids showed that these scents elicited behavioral responses that were not significantly  
250 different from the solvent control (binomial tests:  $p > 0.05$ ), or elicited an aversive  
251 response when compared with the *P. obtusata* mixture (Fig. 4B; binomial tests:  $p < 0.05$ ).  
252 To determine a correlation between mosquito behavior and AL response, we compared  
253 glomerular responses to the odors of the different orchid species. Stimulation with the *P.*  
254 *obtusata* mixture evoked strong glomerular responses in the AL, particularly in the AL3  
255 and LC2 glomeruli, whereas stimulation with the other *Platanthera* scents (containing  
256 much higher lilac aldehyde: nonanal ratios) showed decreased responses in the LC2  
257 glomeruli; however, the AM2 glomerulus (tuned to lilac aldehyde and DEET) showed  
258 much stronger responses (Figs. 4C,D; Kruskal-Wallis test with multiple comparisons:  $p <$   
259  $0.05$ ).

260 To better understand how the ratio of lilac aldehyde and nonanal altered the  
261 activation of the LC2 and AM2 glomeruli, we tested mixtures of lilac aldehyde and  
262 nonanal at different concentration ratios and found that lilac aldehyde suppressed the  
263 response of LC2 to nonanal, suggesting lateral inhibition between these two glomeruli.  
264 Higher lilac aldehyde concentrations increased LC2 suppression, but reciprocally  
265 increased AM2 activation (Fig. 4E,F). By contrast, nonanal caused suppression of AM2  
266 responses to lilac aldehyde, with higher nonanal concentrations causing increased AM2  
267 suppression, while increasing the activation of LC2 (Fig. 4E,F). To determine whether this  
268 suppression of glomerular activity is mediated by  $\gamma$ -aminobutyric acid (GABA), an  
269 important inhibitory neurotransmitter in insect olfactory systems (28-30), we used antisera  
270 against GABA in the *Ae. aegypti* brain and found widespread labelling in AL glomeruli,  
271 including AM2 and LC2 (Fig. 4G). Next, we pharmacologically manipulated the inhibition  
272 by focally applying GABA-receptor antagonists (1  $\mu$ M CGP54626; 10  $\mu$ M picrotoxin) on to  
273 the AL during our experiments. During application of the vehicle (saline) control, LC2 and  
274 AM2 responses to the *P. obtusata* scent were similar to those described above (Fig.  
275 4E,F,H; S8), whereas during antagonist application, the effect of nonanal was blocked  
276 and the small amount of lilac aldehyde in the scent was sufficient to evoke a strong  
277 response in AM2 (Fig. 4H). The antagonists blocked the symmetrical inhibition by  
278 nonanal and lilac aldehyde in the *P. stricta* scent, causing increased response in both  
279 glomeruli, with the LC2 response levels similar to those evoked by *P. obtusata* (Fig. S8).  
280 Taken together, these results support the hypothesis that the ratios of volatile compounds  
281 in the orchid scents, and the resulting balance of excitation and inhibition in the mosquito  
282 AL, play an important role in mediating mosquito attraction to *P. obtusata* and possibly,  
283 reproductive isolation between orchid species.

284

## 285 Discussion

286

287

288 In this study, we use a unique mutualism between *P. obtusata* orchids and *Aedes*  
289 mosquitoes to show the importance of mosquito pollination for this orchid and the role of  
290 scent in mediating this association. Olfactory cues play important roles in a variety of  
291 biological processes for mosquitoes, including locating suitable hosts (5), oviposition sites  
292 (31), and nectar sources (32). For *Aedes* mosquitoes to efficiently locate sources of  
293 nutrients, they must distinguish between complex floral scents in a dynamic chemical  
294 environment (7). In the case of sympatric *Platanthera* orchids – which share the same  
295 scent constituents but differ in their ratios of nonanal and lilac aldehydes –, their scents  
296 evoke distinct patterns of activation in AL glomeruli. How is this occurring? Our results  
297 suggest that GABA-mediated lateral inhibition from the LC2 glomerulus that encodes  
298 nonanal (found in higher abundance in *P. obtusata*) suppresses responses of glomeruli  
299 encoding lilac aldehydes (abundant in the scent of the other *Platanthera* species) which  
allows mosquitoes to distinguish between orchids.

300

301

There are only a handful of mosquito-pollinated flowers, but some of these  
species have been shown to emit similar volatile profiles as *P. obtusata* (8, 9, 32-34). Our



302 results showed that certain terpene volatiles, like lilac aldehyde, were important in the  
303 discrimination of the *P. obtusata* scent, and at low concentrations this volatile was  
304 important for attracting diverse mosquito species. In other mosquitoes, oxygenated  
305 terpene compounds that are derivatives of linalool, like lilac aldehyde and linalool oxide,  
306 were shown to elicit attraction to nectar sources (13, 35, 36). The qualitative similarities in  
307 the scent profiles of attractive nectar sources, and the attractiveness of the *P. obtusata*  
308 scent across mosquito species, raises the question of whether flower scents may be  
309 activating conserved olfactory channels, such as homologous odorant receptors (35).  
310 This will hopefully motivate research to identify the odorant receptors that are responsive  
311 to floral compounds, and their projections to the AL, such as the LC2 and AM2 glomeruli  
312 (35).

313 Our results also demonstrate the importance of mixtures and the processing of  
314 odorant ratios in *Aedes*. Interestingly, some of the volatile compounds emitted from blood  
315 hosts also occur in the *P. obtusata* scent, including nonanal (37, 38). However, in both  
316 *Ae. increpitus* and *Ae. aegypti* mosquitoes, the AL representations of host and orchid  
317 scents were different, suggesting that these odors may be processed via distinct olfactory  
318 channels. Despite the different glomerular ensemble responses, the complex nectar and  
319 host odors may share some of the same coding processes by AL circuits, including lateral  
320 inhibition of glomeruli. Similar to floral scents, human odors are complex mixtures that  
321 can differ between individuals in their constituent ratios, which may explain why  
322 mosquitoes often show behavioral preferences for certain individuals over others (5, 39).  
323 These dissimilarities have important epidemiological implications for disease transmission  
324 (5, 40, 41), and could be related to the subtle differences in the ratios of key compounds  
325 in an individual's scent (39). Future work may explore if mosquito AL circuits process  
326 other complex odors, like those of human scent or other nectar sources, in a manner  
327 similar to that of the orchid scents, and whether the identified odorants and corresponding  
328 glomerular channels and modulatory systems can be leveraged in control interventions.

329

## 330 **Materials and Methods**

331

332 Procedures for floral VOCs collection and analysis, mosquito rearing, the preparation  
333 used for GC-EAD experiments, behavior experiments and associated stimuli, olfactory  
334 stimuli and pharmacological reagents used in calcium imaging experiments, and  
335 immunohistochemistry are described in *SI Appendix*, **Supplementary Methods**.

336

### 337 ***Orchid-pollinator observations and pollination experiments***

338 *Flower observations*. Pollinator activity was monitored in the Okanogan-Wenatchee  
339 National Forest (47.847° N, 120.707° W; WA, USA) from late June to early July in 2016  
340 and 2017 when the flowers of *P. obtusata* were in full bloom. Multiple direct and video  
341 observations of varying lengths from 30 minutes to 2.5 h were made for a total of 46.7

342 hours (15 hours of direct and 31.7 hours of video recordings). The observations were  
343 conducted from 10am to 8pm when mosquitoes were found to visit the flowers.  
344 Observations were recorded by visually inspecting each plant, with the trained observer  
345 approximately 1 m away from the plant – this distance did not influence the feeding and  
346 mosquito-flower visitation since no mosquito took off from the plant in the field and  
347 instead remained busy feeding from flower after flower. To further prevent the potential  
348 for observer interference, video observations were made using GoPro® Hero4 Silver  
349 (San Mateo, CA USA) fitted with a 128gb Lexar® High-Performance 633x microSD card.  
350 Videos were set at 720p resolution, 30 frames per second, and “Narrow” field of view.  
351 These settings were optimized for the memory capacity, battery life, and best resolution  
352 by the camera. Both observation methods, direct and video, provided similar visitation  
353 rates. The visitation time, insect identity, leg color and sex (for mosquitoes), were  
354 recorded from both direct and video observations. The number of feeding (defined by the  
355 probing into the flower using the proboscis) and visits (non-feeding or resting) were  
356 quantified per hour per flower for each pollinator type. Over the course of the  
357 experiments and observations, temperatures ranged from 9.6° to 32.3°C, with a relative  
358 humidity range of 13.4% to 100% (iButtons; Maxim Integrated™, San Jose, CA, USA,  
359 #DS1923). These experiments, therefore, captured both sunny and rainy weather  
360 conditions that were common in this area at this time of the year.

361  
362 Pollinator addition experiments. To evaluate the contribution of mosquitoes to the  
363 pollination of *P. obtusata* orchids, we performed pollinator addition experiments during  
364 June through July in 2016. Mosquitoes were collected from the Okanogan-Wenatchee  
365 National Forest using CDC Wilton traps baited with carbon dioxide (John W. Hock  
366 Company, Gainesville, FL, USA). Carbon dioxide traps provide a standardized method to  
367 sample the mosquito assemblages near and among wetland habitats (42, 43). Traps  
368 were placed within the sedge habitat, but more than 60 m from the nearest focal flower  
369 patch to prevent any disturbance.

370 *P. obtusata* from the same site were enclosed in Bug Dorm cages (30cm x 30cm  
371 x 30cm; BioQuip® Products, Rancho Dominguez, CA, USA, # 1452) for which the bottom  
372 panel were removed to cover the orchid. Thirty mosquitoes were introduced into each  
373 cage through a sleeve located on the front panel and left without human interference for a  
374 duration of 48 h, after which the mosquitoes were collected from the enclosures and  
375 identified. The number and species of mosquitoes with pollinium attached were recorded,  
376 and plant was bagged for determination of the fruit-to-flower ratio at the end of the field  
377 season. A total of nineteen enclosures were used; 11 enclosures with a single plant, and  
378 8 enclosures with 2-3 plants.

379  
380 Pollen limitation studies. To determine the importance of pollination and out-crossing on  
381 *P. obtusata* fruit set, plants were subject to four different experimental treatments during  
382 the June through July summer months. For two weeks, plants were either unbagged (n =  
383 20 plants) or bagged to prevent pollinator visitation (n = 19 plants). Organza bags (Model  
384 B07735-1; Housweety, Causeway Bay, Hong-Kong) were used to prevent pollinators

385 from visiting the flowers. In addition, we determined the importance of cross- and self-  
386 pollination for *P. obtusata*. For cross pollination, six pollinia were removed from two plants  
387 using a toothpick and gently brushed against the stigma of a neighboring plant (n = 11  
388 plants). To examine the effects of self-pollination, six pollinia were removed from three  
389 flowers and gently brushed the flowers on the same plant (n = 9 plants). At the end of the  
390 field season, the number of flowers and the number of fruits produced per individual  
391 plants were recorded and the fruit-to-flower ratios were calculated. For comparing the fruit  
392 weights and the seed set for each treatment, up to four fruits from each individual of *P.*  
393 *obtusata* were collected. The weights were measured with a digital scale (Mettler Toledo,  
394 Columbus, OH, USA), and the number of viable seeds per fruit were counted using an  
395 epifluorescent microscope (60x magnification; Nikon Ti4000). Fruit weights and seed sets  
396 were compared using a Student's *t*-test; fruit-flower ratios were compared using a Mann-  
397 Whitney Test.

398  
399

### ***Gas Chromatography coupled with Electroantennogram Detection (GC-EADs)***

400 Electroantennogram signals were filtered and amplified (100×; 0.1-500 Hz) using an A-M  
401 1800 amplifier (Sequim, WA, USA) connected to a personal computer via a BNC-2090A  
402 analog-to-digital board (National Instruments, Austin, TX, USA) and digitized at 20 Hz  
403 using WinEDR software (Strathclyde Electrophysiology Software, Glasgow, UK). A Hum  
404 Bug noise eliminator (Quest Scientific, Vancouver, Canada) was used to decrease  
405 electrical noise. The antennal responses to peaks eluting from the GC were measured for  
406 each mosquito preparation and for each peak and mosquito species. Bioactive peaks  
407 were those that elicited strong EAD responses, corresponding to deflections beyond the  
408 average noise floor of the baseline EAD signal. Responses by each individual preparation  
409 were used for Principal Component Analysis (Ade4 package, R). The responses of eight  
410 different mosquito species were tested to the scent extracts of three orchid species (n = 8  
411 mosquito species for *P. obtusata*; n = 4 mosquito species each for *P. stricta* and *P.*  
412 *huronensis*; with 3-17 replicates per mosquito species per orchid, for a total of 109 GC-  
413 EAD experiments).

414

### ***Two-photon excitation microscopy***

416 *Calcium imaging in the Ae. increpitus mosquito AL.* Odor-evoked responses in the *Ae.*  
417 *increpitus* mosquito antennal lobe (AL) with nine female mosquitoes at the beginning of  
418 the season when mosquitoes were relatively young (as defined by wing and scale  
419 appearance). Calcium imaging experiments were conducted using application of the  
420 calcium indicator Fluo4 to the mosquito brain and using a stage that allows simultaneous  
421 calcium imaging and tethered flight (23). The mosquito was cooled on ice and transferred  
422 to a Peltier-cooled holder that allows the mosquito head to be fixed to the stage using  
423 ultraviolet glue. The custom stage permits the superfusion of saline to the head capsule  
424 and space for movement by the wings and proboscis (23) (Fig. 3). Once the mosquito

425 was fixed to the stage, a window in its head was cut to expose the brain, and the brain  
426 was continuously superfused with physiological saline (22, 23). Next, the perineural  
427 sheath was gently removed from the AL using fine forceps and 75  $\mu$ L of the Fluo4  
428 solution – made by 50 mg of Fluo4 in 30  $\mu$ L Pluronic F-127 and then subsequently diluted  
429 in 950  $\mu$ L of mosquito physiological saline – was pipetted to the holder allowing the brain  
430 to be completely immersed in the dye. Mosquitoes were kept in the dark at 15° C for 1.5 h  
431 (the appropriate time for adequate penetration of the dye into the tissue), after which the  
432 brain was washed 3 times with physiological saline. After the rinse, mosquitoes were kept  
433 in the dark at room temperature for approximately 10-20 min. before imaging.

434 Wing stroke amplitudes was acquired and analyzed using a custom camera-  
435 based computer vision system at frame rates of 100 Hz (23, 44), where the mosquito was  
436 illuminated with infrared LEDs (880 nm) and images were collected with an infrared-  
437 sensitive camera synched to the two-photon system. Stimulus-evoked initiation of flight  
438 and changes in the amplitude of the wing-stroke envelope were characterized for each  
439 odor stimulus (*sensu* 23). Calcium-evoked responses in the AL were imaged using the  
440 Prairie Ultima IV two-photon excitation microscope (Prairie Technologies) and Ti-  
441 Sapphire laser (Chameleon Ultra; Coherent). Experiments were performed at a depth of  
442 40  $\mu$ m from the ventral surface of the AL, allowing the calcium dynamics from  
443 approximately 18-22 glomeruli to be repeatedly imaged across preparations. Images  
444 were collected at 2 Hz, and for each odor stimulus images were acquired for 35 s, starting  
445 10 s before the stimulus onset. Imaging data were extracted in Fiji/ImageJ and imported  
446 into Matlab (v2017; Mathworks, Natick, Massachusetts) for Gaussian filtering (2 $\times$ 2 pixel;  
447  $\sigma$  = 1.5-3) and alignment using a single frame as the reference at a given imaging depth  
448 and subsequently registered to every frame to within  $\frac{1}{4}$  pixel. Trigger-averaged  $\Delta F/F$   
449 were used for comparing glomerular responses between odor stimuli. After an  
450 experiment, the AL was sequentially scanned at 1  $\mu$ m depths from the ventral to dorsal  
451 surface. Ventral glomeruli to the 40  $\mu$ m depth were 3D reconstructed using Reconstruct  
452 software or Amira v5 (Indeed-Visual Concepts, Houston TX, USA) to provide glomerular  
453 assignment and registration between preparations. Glomeruli in the ventral region of the  
454 AL, based on their positions, were tentatively assigned names similar to those in *Ae.*  
455 *aegypti* (23, 45).  
456

457 Calcium imaging in the *Ae. aegypti* mosquito AL. Odor-evoked responses in the *Ae.*  
458 *aegypti* AL were imaged taking advantage of our genetically-encoded *PUB-GCaMPs*  
459 mosquito line (21). A total of twenty preparations were used: 10 for single odorant and  
460 orchid mixture experiments; 6 for ratio experiments; and 4 for experiments using GABA-  
461 receptor antagonists. Glomeruli were imaged at 40  $\mu$ m from the ventral surface, as  
462 glomeruli at this depth show strong responses to odorants in the orchid headspace,  
463 including nonanal, octanal, and lilac aldehyde, and at this depth approximately 14-18  
464 glomeruli can be neuroanatomically identified and registered between preparations.  
465 Expression of GCaMP occurred in glia, local interneurons, and projection neurons.  
466 Nevertheless, double-labelling for GFP (GCaMPs) and glutamine synthase (GS; glial

467 marker) revealed broad GFP labelling that did not always overlap with the glial stain, with  
468 GS-staining often occurring on astroglial-like processes on the rind around glomeruli, and  
469 strong GFP occurring within the glomeruli (Fig. S9). Thus, in our calcium imaging  
470 experiments we took care to image from the central regions of the glomeruli and avoid the  
471 sheaths and external glomerular loci. Moreover, strong GFP staining occurred in soma  
472 membranes located in the medial and lateral cell clusters, which contain the projection  
473 neurons and GABAergic local interneurons, respectively; the vast majority of these cell  
474 bodies did not stain for GS (Fig. S9). Relatedly, GCaMP6s expression is very high in AL  
475 local interneurons and projection neurons (PNs), such that during odor stimulation the  
476 PNs and axonal processes can often be imaged, and 3D reconstructions can be take  
477 place through simultaneous optical sections with odor stimulation. Nonetheless, we  
478 assume the glomerular responses are a function of multiple cell types. In other insects,  
479 GABAergic modulation has been shown to operate on olfactory receptor neurons, local  
480 interneurons and PNs (28-30).

481           Similar to experiments with *Ae. increpitus*, the majority the mosquitoes were UV-  
482 glued to the stage to allow free movement of their wings and proboscis; however, for  
483 experiments using GABA-receptor antagonists the proboscis was glued to the stage for  
484 additional stability. Once the mosquito was fixed to the stage, a window in its head was  
485 cut to expose the brain, and the brain was continuously superfused with physiological  
486 saline (22).

487  
488

## 489 **Acknowledgments**

490 We are grateful for the advice and assistance provided by G. Thornton, J. Patt, B.  
491 Nguyen, E. Lutz, J. Lim, E. Mathis, M. Clifford, and K. Moosavi. Photo images of  
492 *Platanthera* orchids and mosquitoes are courtesy of G. van Velsir, R. Coleman, T.  
493 Nelson, A. Jewiss-Gaines and F. Hunter. Funding: Support for this project was funded by  
494 National Institutes of Health under grants RO1-DC013693 (J.A.R.) and R21-AI137947  
495 (J.A.R.); Air Force Office of Scientific Research under grants FA9550-14-1-0398 (J.A.R.)  
496 and FA9550-16-1-0167 (J.A.R.); an Endowed Professorship for Excellence in Biology  
497 (J.A.R.), and the University of Washington Innovation Award (J.A.R.).

498  
499

## 500 **Competing Interests**

500 The authors declare no competing interests. A provisional patent on the mixture that  
501 mimics the orchid scent was recently filed (62/808,710).

502  
503

## 504 **References**

505

- 506 1. World Health Organization. A global brief on vector-borne diseases. No.  
507 WHO/DCO/WHD/2014.1 (2014).



- 508 2. R. T. Cardé, G. Gibson, Host finding by female mosquitoes: mechanisms of  
509 orientation to host odours and other cues. *Olfaction in vector-host interactions* 2010, 115-  
510 142 (2010).
- 511 4. C. J. McMeniman, R. A. Corfas, B. J. Matthews, S. A. Ritchie, L. B. Vosshall,  
512 Multimodal integration of carbon dioxide and other sensory cues drives mosquito  
513 attraction to humans. *Cell* 156, 1060-1071 (2014).
- 514 5. W. Takken, N. O. Verhulst, Host preferences of blood-feeding mosquitoes. *Annual*  
515 *review of entomology* 58, 433-453 (2013).
- 516 6. F. Van Breugel, J. Riffell, A. Fairhall, M. H. Dickinson, Mosquitoes use vision to  
517 associate odor plumes with thermal targets. *Current Biology* 25, 2123-2129 (2015). W. A.
- 518 7. Foster, Mosquito sugar feeding and reproductive energetics. *Annual review of*  
519 *entomology* 40, 443-474 (1995).
- 520 8. Manda, H., L.C. Gouagna, W.A. Foster, R.R. Jackson, J.C. Beier, J.I. Githure, and  
521 A. Hassanali, Effect of discriminative plant-sugar feeding on the survival and fecundity of  
522 *Anopheles gambiae*. *Malaria journal*, 2007. 6(1): p. 113.
- 523 9. U. S. Jhumur, S. Dötterl, A. Jürgens, Floral odors of *Silene otites*: their variability  
524 and attractiveness to mosquitoes. *Journal of Chemical Ecology* 34, 14 (2008).
- 525 10. D. A. Peach, G. Gries, Nectar thieves or invited pollinators? A case study of tansy  
526 flowers and common house mosquitoes. *Arthropod-Plant Interactions* 10, 497-506 (2016).
- 527 11. N. Brantjes, J. Leemans, *Silene otites* (Caryophyllaceae) pollinated by nocturnal  
528 Lepidoptera and mosquitoes. *Acta botanica neerlandica* 25, 281-295 (1976).
- 529 12. Nikbakhtzadeh, M.R., J.W. Terbot, P.E. Otienoburu, and W.A. Foster, Olfactory  
530 basis of floral preference of the malaria vector *Anopheles gambiae* (Diptera: Culicidae)  
531 among common African plants. *Journal of Vector Ecology*, 2014. 39(2): p. 372-383.
- 532 13. Nyasembe, V. O., & Torto, B. (2014). Volatile phytochemicals as mosquito  
533 semiochemicals. *Phytochemistry letters*, 8, 196-201.
- 534 14. Inouye, D.W., 2010. Mosquitoes: more likely nectar thieves than pollinators.  
535 *Nature*, 467(7311), p.27.
- 536 15. J. S. Dexter, Mosquitoes pollinating orchids. *Science* 37, 867-867 (1913).
- 537 16. L. B. Thien, Mosquito pollination of *Habenaria obtusata* (Orchidaceae). *American*  
538 *Journal of Botany* 56, 232-237 (1969).
- 539 17. L. B. Thien, F. Utech, The mode of pollination in *Habenaria obtusata*  
540 (Orchidaceae). *American Journal of Botany* 57, 1031-1035 (1970).
- 541 18. Stoutamire, W.P., Mosquito pollination of *Habenaria obtusata* (Orchidaceae).  
542 *Mich. Bot*, 1968. 7: p. 203-212.
- 543 19. Wallace, L.E., 2006. Spatial genetic structure and frequency of interspecific  
544 hybridization in *Platanthera aquilonis* and *P. dilatata* (Orchidaceae) occurring in sympatry.  
545 *American Journal of Botany*, 93(7), pp.1001-1009.



- 546 20. Bateman, R.M., James, K.E., Luo, Y.B., Lauri, R.K., Fulcher, T., Cribb, P.J. and  
547 Chase, M.W., 2009. Molecular phylogenetics and morphological reappraisal of the  
548 Platanthera clade (Orchidaceae: Orchidinae) prompts expansion of the generic limits of  
549 Galearis and Platanthera. *Annals of Botany*, 104(3), pp.431-445.
- 550 21. M. Bui *et al.*, Live calcium imaging of *Aedes aegypti* neuronal tissues reveals  
551 differential importance of chemosensory systems for life-history-specific foraging  
552 strategies. *BMC Neuroscience*, 20, 1-17 (2019).
- 553 22. C. Vinauger *et al.*, Visual-olfactory integration in the human disease vector  
554 mosquito *Aedes aegypti*. *Current Biology* 29, 2509-2516. e5 (2019).
- 555 23. C. Vinauger *et al.*, Modulation of host learning in *Aedes aegypti* mosquitoes.  
556 *Current Biology* 28, 333-344. e338 (2018).
- 557 24. M. Ditzen, M. Pellegrino, L. B. Vosshall, Insect odorant receptors are molecular  
558 targets of the insect repellent DEET. *Science* 319, 1838-1842 (2008).
- 559 25. W. S. Leal, The enigmatic reception of DEET—the gold standard of insect  
560 repellents. *Current opinion in insect science* 6, 93-98 (2014).
- 561 26. M. Rowland *et al.*, DEET mosquito repellent provides personal protection against  
562 malaria: a household randomized trial in an Afghan refugee camp in Pakistan. *Tropical*  
563 *medicine & international health* 9, 335-342 (2004).
- 564 27. Z. Syed, W. S. Leal, Mosquitoes smell and avoid the insect repellent DEET.  
565 *Proceedings of the National Academy of Sciences* 105, 13598-13603 (2008).
- 566 28. S. R. Olsen, R. I. Wilson, Lateral presynaptic inhibition mediates gain control in an  
567 olfactory circuit. *Nature* 452, 956 (2008).
- 568 29. A. F. Silbering, C. G. Galizia, Processing of odor mixtures in the *Drosophila*  
569 antennal lobe reveals both global inhibition and glomerulus-specific interactions. *Journal*  
570 *of Neuroscience* 27, 11966-11977 (2007).
- 571 30. B. Waldrop, T. A. Christensen, J. G. Hildebrand, GABA-mediated synaptic  
572 inhibition of projection neurons in the antennal lobes of the sphinx moth, *Manduca sexta*.  
573 *Journal of Comparative Physiology A: Neuroethology, Sensory, Neural, and Behavioral*  
574 *Physiology* 161, 23-32 (1987).
- 575 31. F. Zhu, P. Xu, R. M. Barbosa, Y.-M. Choo, W. S. Leal, RNAi-based demonstration  
576 of direct link between specific odorant receptors and mosquito oviposition behavior.  
577 *Insect biochemistry and molecular biology* 43, 916-923 (2013).
- 578 32. W. A. Foster, R. Hancock, Nectar-related olfactory and visual attractants for  
579 mosquitoes. *Journal of the American Mosquito Control Association* 10, 288-296 (1994).
- 580 33. U. S. Jhumur, S. Dötterl, A. Jürgens, Electrophysiological and behavioural  
581 responses of mosquitoes to volatiles of *Silene otites* (Caryophyllaceae). *Arthropod-Plant*  
582 *Interactions* 1, 245 (2007).
- 583 34. S. Joseph, Fruit feeding of mosquitoes in nature. *Proceedings. New Jersey*  
584 *Mosquito Extermination Association* 57, 125-131 (1970).

585

586 35. F. Zeng, P. Xu, W.S. Leal, Odorant receptors from *Culex quinquefasciatus* and  
587 *Aedes aegypti* sensitive to floral compounds. *Insect Biochemistry and Molecular Biology*,  
588 113, p.103213 (2019).

589 36. V.O. Nyasembe, P.E. Teal, W.R. Mukabana, J.H. Tumlinson, B. Tort. Behavioural  
590 response of the malaria vector *Anopheles gambiae* to host plant volatiles and synthetic  
591 blends. *Parasites & Vectors* 5, 234 (2012).

592 37. Z. Syed, W. S. Leal, Acute olfactory response of *Culex* mosquitoes to a human-  
593 and bird-derived attractant. *Proceedings of the National Academy of Sciences*, pnas.  
594 0906932106 (2009).

595 38. U. R. Bernier, D. L. Kline, D. R. Barnard, C. E. Schreck, R. A. Yost, Analysis of  
596 human skin emanations by gas chromatography/mass spectrometry. 2. Identification of  
597 volatile compounds that are candidate attractants for the yellow fever mosquito (*Aedes*  
598 *aegypti*). *Analytical Chemistry* 72, 747-756 (2000).

599 39. H. M. Leal, J. K. Hwang, K. Tan, W. S. Leal, Attraction of *Culex* mosquitoes to  
600 aldehydes from human emanations. *Scientific reports* 7, 17965 (2017).

601 40. D. W. Kelly, Why are some people bitten more than others? *Trends in*  
602 *parasitology* 17, 578-581 (2001).

603 41. J. E. Simpson *et al.*, Vector host-feeding preferences drive transmission of multi-  
604 host pathogens: West Nile virus as a model system. *Proceedings of the Royal Society of*  
605 *London B: Biological Sciences* 279, 925-933 (2012).

606 42. D. C. Franklin, P. I. Whelan, Tropical mosquito assemblages demonstrate  
607 'textbook' annual cycles. *PloS one* 4, e8296 (2009).

608 43. J. B. Silver, *Mosquito ecology: field sampling methods*. (springer science &  
609 business media, 2007).

610 44. M. P. Suver, A. Huda, N. Iwasaki, S. Safarik, M. H. Dickinson, An array of  
611 descending visual interneurons encoding self-motion in *Drosophila*. *Journal of*  
612 *Neuroscience* 36, 11768-11780 (2016).

613 45. R. Ignell, T. Dekker, M. Ghaninia, B. S. Hansson, Neuronal architecture of the  
614 mosquito deutocerebrum. *Journal of Comparative Neurology* 493, 207-240 (2005).

615

616 **Figures and Tables**  
617

**Figure 1**

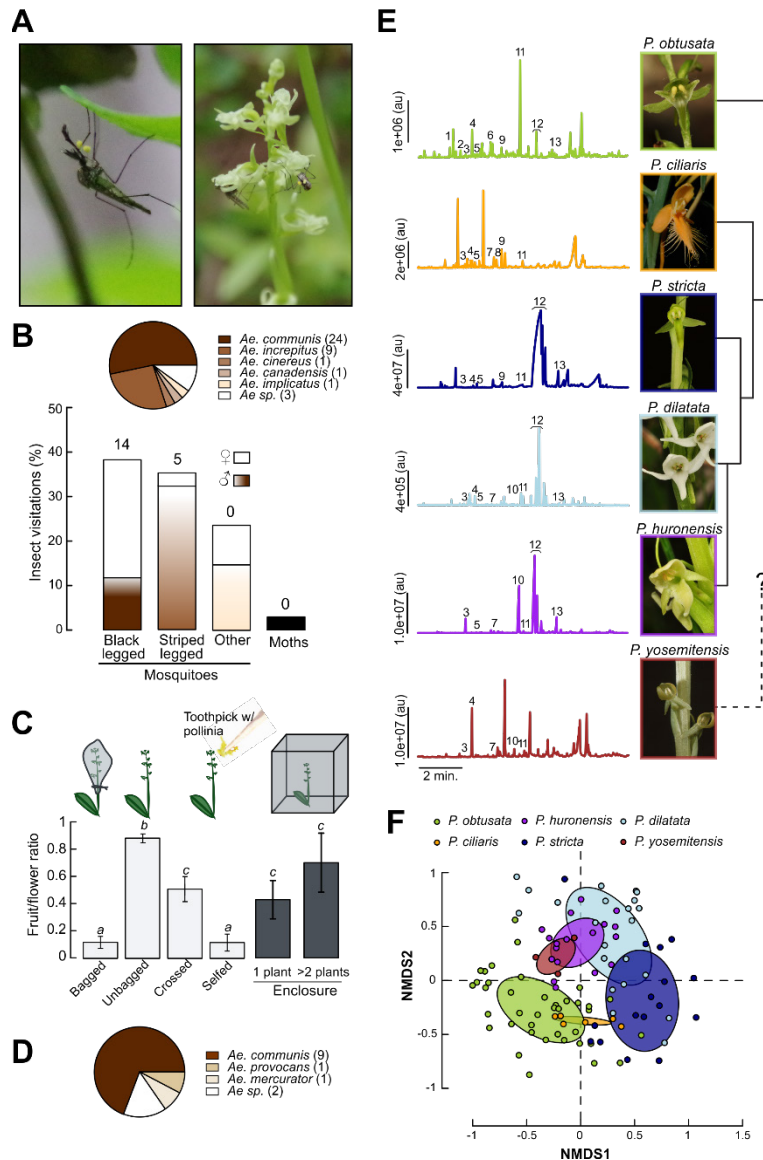

618

619 **Figure 1. Association between the *P. obtusata* orchid and mosquito pollinators.**

620 (A) Picture (left image) of a black legged male mosquito bearing two pollinia on its head,  
621 and (right image) a male mosquito feeding on *P. obtusata* and a female with two pollinia  
622 attached to its head after having visited a flower.

623 (B) Insect visitations (barplot; % insect visitation, calculated by the total number of insect  
624 visits to *P. obtusata*) and distribution of the mosquito species found in the field with  
625 pollinia (pie chart; numbers in legend denote the number of mosquitoes with pollinia).

626 Both males (dark grey bars) and females (white bars) of different mosquito species visited

627 the plants. Black-legged mosquitoes were pre-dominantly *Ae. communis*, and striped  
628 legged were *Ae. increpitus*. Numbers above the bars indicate the number of individuals  
629 observed with pollinia.

630 **(C)** Fruit to flower ratio for bagged (using Organza bags around *P. obtusata* plants to  
631 prevent pollinator visitation), unbagged, self-crossed, out-crossed plants, and plants in  
632 the enclosure. Bagged and self-pollinated plants produced similar fruit-to-flower ratios  
633 ( $0.11 \pm 0.04$ ,  $0.12 \pm 0.06$ , respectively; Mann-Whitney Test:  $p = 0.99$ ), but were  
634 significantly lower than the unbagged plants ( $0.89 \pm 0.03$ ; Mann-Whitney Test,  $p < 0.001$ ).  
635 Although fruit weight did not differ between treatments (Student's t-test,  $p = 0.082$ ),  
636 bagged plants produced significantly less viable seeds per fruit per flower than unbagged  
637 plants (Fig. S1; Wilcoxon rank sum test,  $p < 0.05$ ). Letters above bars show statistical  
638 differences between experimental conditions (Mann-Whitney Test:  $p < 0.05$ ). Bars are the  
639 mean  $\pm$  SEM ( $n = 8-20$  plants/treatment).

640 **(D)** Pie chart of the species of mosquitoes which removed pollinia from the plants in the  
641 enclosures (numbers in legend denote the number of mosquitoes with pollinia).

642 **(E)** Gas chromatography / mass spectrometry (GCMS) analyses of the floral volatiles  
643 emitted by *P. obtusata*, *P. ciliaris*, *P. stricta*, *P. dilatata*, *P. huronensis*, and *P.*  
644 *yosemitensis*. Pictures of the floral species, and their phylogenetic relationship, are  
645 shown on the right. *P. obtusata* flowers emitted a low emission rate scent that is  
646 dominated by aliphatic compounds (including octanal (#7), 1-octanol (#9), and nonanal  
647 (#11); 54% of the total emission), whereas the moth-visited species *P. dilatata*, *P.*  
648 *huronensis* and *P. stricta* emit strong scents dominated by terpenoid compounds (75%,  
649 76% and 97% of the total emission for the three species, respectively), and the butterfly-  
650 visited *P. ciliaris* orchid is dominated by nonanal and limonene (24% and 12% of the total  
651 emission respectively) (SI Table 3). Numbers in the chromatograms correspond to: (1)  $\alpha$ -  
652 pinene, (2) camphene, (3) benzaldehyde, (4)  $\beta$ -pinene, (5)  $\beta$ -myrcene, (6) octanal, (7) D-  
653 limonene, (8) eucalyptol, (9) 1-octanol, (10) ( $\pm$ )linalool, (11) nonanal, (12) lilac aldehydes  
654 (D and C isomers), and (13) lilac alcohol. Phylogeny to the right is from (20). **(F)** Non-  
655 metric multidimensional scaling (NMDS) plot (stress = 0.265) of the chemical composition  
656 of the scent of all the orchid species presented in B. Each dot represents a sample from a  
657 single individual plant collected in the field. The ellipses represent the standard deviation  
658 around the centroid of their respective cluster. Differences in scent composition and  
659 emission rate are significantly different between species (composition: ANOSIM,  $R=0.25$ ,  
660  $p=0.001$ ; emission rate: Student t-tests,  $p < 0.05$ ).

661  
662  
663



685 on these responses (see Supplementary Methods for details). The colored flask denotes  
686 the use of an artificial mixture (dark green is with lilac aldehyde; light green is without);  
687 empty flask denotes the negative (solvent) control. The plant motif is the positive control  
688 (orchid flowers), and the + and - symbols represent the presence or absence of the lilac  
689 aldehyde in the stimulus, respectively. Bars are the mean  $\pm$  SEM (n = 27 - 75  
690 mosquitoes/treatment); asterisks denote a significant difference between treatments and  
691 the mineral oil (no odor) control (binomial test:  $p < 0.05$ ).  
692



Figure 3

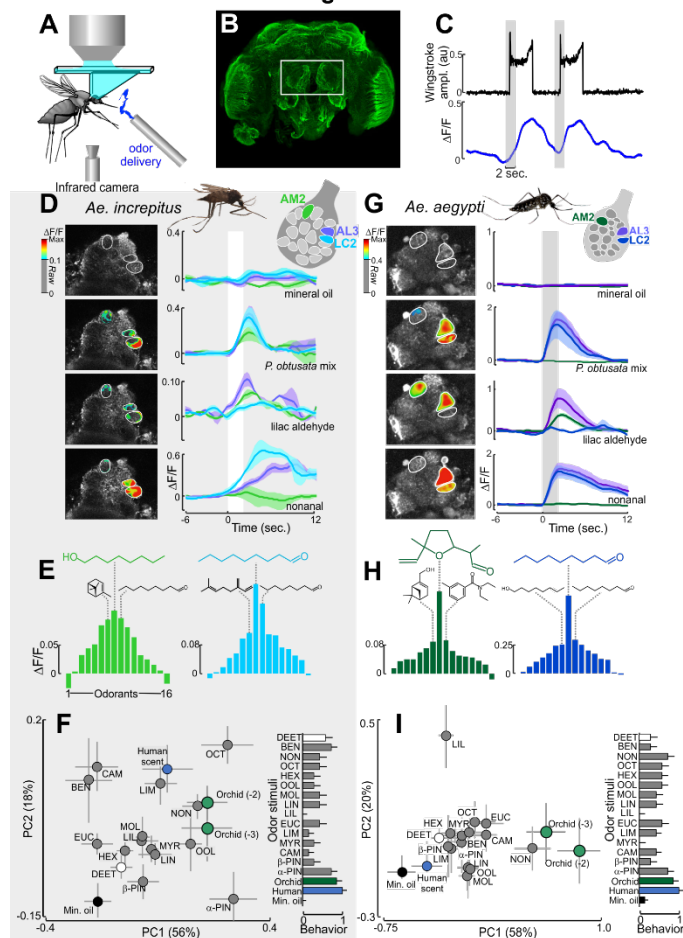

693

694

**Figure 3. Mosquito antennal lobe responses to the *P. obtusata* scent.**

695

(A) Schematic of the two-photon setup used to record calcium dynamics in the mosquito AL.

696

(B) *Ae. aegypti* brain ( $\alpha$ -tubulin stain). The white rectangle surrounds the two ALs that are accessible for calcium imaging. Optical sectioning using the 2-photon microscope and subsequent immunohistochemical characterization allowed us to register glomeruli to an AL atlas as well as repeatably image from the same glomeruli. Although the AL between species differed in volume ( $0.0029 \pm 0.0001$  and  $0.0062 \pm 0.0004$  mm<sup>3</sup> for *Ae. aegypti* and *Ae. increpitus*, respectively), they consisted of similar numbers of glomeruli (18-22 glomeruli) in the ventral region of the AL, approximately 40  $\mu$ m from the surface.

697

(C) Representative time traces of behavioral (wing-stroke amplitude)(top, black) and AL LC2 glomerulus response (bottom, blue) to two *P. obtusata* odor stimulations (grey bars).

698

(D) For *Ae. increpitus* mosquitoes with bath-application of Fluo4, schematic of AL glomeruli imaged at the 40  $\mu$ m depth (top) and pseudo-color plot overlying the raw greyscale image (left) and mean  $\Delta F/F$  time traces (right) for *Ae. increpitus* AL glomerular (AM2 [green], LC2 [blue] and AL3 [purple]) responses to mineral oil (no odor) control (top); *P. obtusata* mix (middle, top); lilac aldehyde (middle, bottom); and nonanal

699

700

701

702

703

704

705

706

707

708

709

710

711 (bottom). White bars are the odor stimulations. Traces are the mean from 3-9  
712 mosquitoes; shaded areas denote the SEM. Pseudo-color images were generated by  
713 subtracting the frame before stimulus onset from the frames during the stimulus window;  
714 only those glomerular regions of interest that were  $>0.1 \Delta F/F$  are shown.  
715 **(E)** Tuning curves for the *Ae. increpitus* AM2 (green) and LC2 (blue) glomeruli based on a  
716 panel of sixteen odorants. AM2 is most responsive to octanol (green chemical structure),  
717 followed by  $\alpha$ -pinene and nonanal (black chemical structures). LC2 is most responsive to  
718 nonanal (blue), followed by octanal and  $\beta$ -myrcene (black chemical structures). Bars are  
719 the mean (n=3-9).  
720 **(F)** (Left) Principal component (PC) plot from responses of 20 glomeruli to the odorants.  
721 PC1 and PC2 explain 56% and 18% of the variance, respectively. The orchid mixture at  
722 two concentrations (1:100 and 1:1000 dilution) and nonanal evoked stronger responses  
723 than the mineral oil (no odor) control (Kruskal-Wallis test:  $p < 0.05$ ) and were significantly  
724 different in the multivariate analysis (ANOSIM:  $p < 0.05$ ). Error bars represent SEM. (Right)  
725 Behavioral responses of the tethered mosquitoes to the odor stimuli. Responses were  
726 significantly different between the mineral oil control and the human and orchid scents  
727 (Kruskal-Wallis test:  $p < 0.05$ ), although they were not significantly correlated with the  
728 glomerular representations (Spearman rank correlation:  $\rho = 0.35$ ;  $p = 0.16$ ).  
729 **(G)** As in D, but for *PUB-GCaMP6s Ae. aegypti* mosquitoes and the AM2 (green), LC2  
730 (blue) and AL3 (purple) AL glomeruli. Traces are the mean (n=7-14 mosquitoes); shaded  
731 area is the SEM.  
732 **(H)** As in E, but for the *Ae. aegypti* AM2 and LC2 glomeruli. AM2 is the most responsive  
733 to lilac aldehyde (green), followed by DEET and myrtenol (black chemical structures).  
734 LC2 is the most responsive to nonanal (blue), followed by octanal and octanol (black  
735 chemical structures). Bars are the mean (n=7-14 mosquitoes).  
736 **(I)** (Left) As in F, but for the *Ae. aegypti* mosquito and the 18 imaged glomerular  
737 responses to the panel of odorants. PC1 and PC2 explain 58% and 20% of the variance,  
738 respectively. (Right) Behavioral responses for the orchid and human scents were  
739 significantly different from control ( $p < 0.05$ ), although the correlation with the glomerular  
740 responses was not significant (Spearman rank correlation:  $\rho = 0.46$ ;  $p = 0.07$ ).

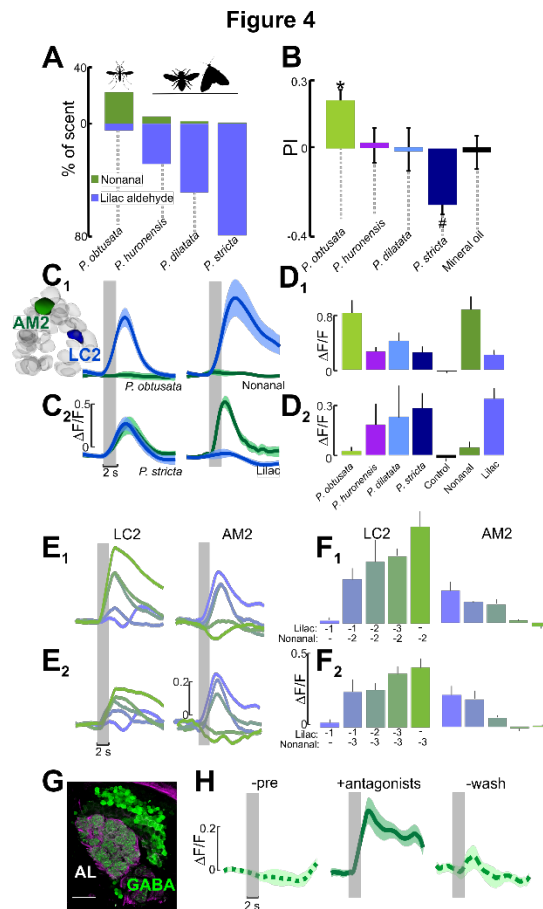

741

742

743

**Figure 4. Figure 4. Glomeruli encoding the orchid scents are sensitive to odorant ratios.**

744

745

746

747

748

749

750

751

752

753

754

755

756

757

758

759

(A) Percentage of nonanal and lilac aldehyde concentrations in the different *Platanthera* orchid scents, which have 6- to 40-fold higher lilac aldehyde concentrations than *P. obtusata*.

(B) Behavioral preferences by *Ae. aegypti* mosquitoes to scent mixtures containing lilac aldehydes at the concentrations quantified in the different *Platanthera* species. Similar to Fig. 2C, mosquitoes were released in a y-olfactometer and had to choose between two arms carrying the scent mixture or no odorant (control). Asterisk denotes a significant difference from the mineral oil control (binomial test:  $p < 0.05$ ); number symbol denotes a significant difference from the *P. obtusata* scent (binomial test:  $p < 0.05$ ).

(C) (C<sub>1</sub>) Mean  $\Delta F/F$  time traces for LC2 (blue) and AM2 (green) glomeruli to *P. obtusata* (left) and nonanal (right). (C<sub>2</sub>) Same as in C<sub>1</sub>, except to the *P. stricta* scent (left) and lilac aldehyde (right). The *P. obtusata* and *P. stricta* mixtures contain the same concentration of nonanal and other constituents but differ in their lilac aldehyde concentrations (see panel A). Traces are the mean ( $n=6-10$  mosquitoes); shaded areas denote  $\pm$ SEM.

(D) (D<sub>1</sub>) Responses of the LC2 glomerulus to the different *Platanthera* orchid mixtures, and the single odorants nonanal and lilac aldehyde. The increasing concentration of lilac

760 aldehyde in the other orchid mixtures caused a significant suppression of LC2 response  
761 to the nonanal in the scents (Kruskal-Wallis test:  $p < 0.05$ ), even though nonanal was at  
762 the same concentration as in the *P. obtusata* mixture. (D<sub>2</sub>) Responses of the AM2  
763 glomerulus to the different *Platanthera* orchid scents and nonanal and lilac aldehyde  
764 constituents. The increasing concentration of lilac aldehyde in the other orchid scents  
765 caused a significant increase in AM2 responses compared with responses to *P. obtusata*  
766 (Kruskal-Wallis test:  $p < 0.05$ ). Bars are the mean  $\pm$  SEM.

767 **(E)**  $\Delta F/F$  time traces for the LC2 (left) and AM2 (right) glomeruli. The preparation was  
768 simultaneously stimulated using separate vials of lilac aldehyde and nonanal at different  
769 concentrations to create 10 different mixture ratios. (E<sub>1</sub>) Each trace is a different ratio of  
770 lilac aldehyde to nonanal, ranging from green ( $10^{-2}$  nonanal: 0 lilac aldehyde) to purple (0  
771 nonanal:  $10^{-1}$  lilac aldehyde);  $10^{-3}$  to  $10^{-1}$  lilac aldehyde, and  $10^{-2}$  nonanal concentrations  
772 were tested. (E<sub>2</sub>) As in E<sub>1</sub>, except tested concentrations were  $10^{-3}$  to  $10^{-1}$  for lilac  
773 aldehyde, and  $10^{-3}$  for nonanal.

774 **(F)** (F<sub>1</sub>) Mean  $\Delta F/F$  during 2 sec. of odor presentation for the LC2 glomerulus (left) and  
775 the AM2 glomerulus (right). Bars are color-coded according to the ratio of lilac aldehyde  
776 to nonanal traces in E<sub>1</sub>. (F<sub>2</sub>) As in F<sub>1</sub>, except the concentrations of lilac aldehyde and  
777 nonanal in the ratio mixtures correspond to those in E<sub>2</sub>. Bars are the mean ( $n=6$ )  $\pm$  SEM.

778 **(G)** Antibody labeling against GABA (green) in the right *Ae. aegypti* AL; background label  
779 (alpha-tubulin) is purple. Scale bar is 20  $\mu\text{m}$ .

780 **(H)** Mean  $\Delta F/F$  time traces for the AM2 glomerulus. GABA receptor antagonists block the  
781 suppressive effect of nonanal to AM2's response to the lilac aldehyde in the *P. obtusata*  
782 mixture, causing a significantly higher response than the pre-application and wash  
783 periods (Kruskal-Wallis test:  $p < 0.05$ ). Traces are the mean ( $n = 4$  mosquitoes)  $\pm$  SEM.  
784

## 1 **Supplementary Methods**

2

### 3 ***Floral VOCs collection and analysis***

4 **Orchid species.** To characterize the orchid scents, headspace collections were performed during  
5 the summers of 2014, 2015 and 2016 in the Okanogan-Wenatchee National Forest (Washington,  
6 USA) and Yosemite National Park (California, USA). The scents of six *Platanthera* orchid species  
7 were studied: *P. obtusata* ((Banks ex Pursh) Lindley), the blunt-leaved orchid; *P. stricta* (Lindley),  
8 the slender bog orchid; *P. huronensis* (Lindley), the green bog orchid; *P. dilatata* (Pursh), the  
9 white bog orchid; *P. yosemitensis* (Colwell, Sheviak and Moore), the Yosemite bog orchid and *P.*  
10 *ciliaris* (Lindley), the yellow fringed orchid (Table S1). In the field, the plants were identified using  
11 a key (1). *P. ciliaris* was obtained from a nursery (Great Lakes Orchid LLC, Belleville, Michigan,  
12 USA) and maintained in the greenhouse of the Biology Department, at the University of  
13 Washington in Seattle, USA. Specimens of *P. obtusata*, *P. stricta* and *P. dilatata* were also  
14 maintained in the greenhouse as well as sampled in the field. For all orchid species, scents were  
15 collected during their peak flowering time and from those with unpollinated flowers.

16  
17 **Floral scent collection.** To collect the flower scent, the inflorescence of the plant was enclosed in  
18 a nylon oven bag (Reynolds Kitchens, USA) that was tight around the stem. Two tygon tubes  
19 (Cole-Parmer, USA) were inserted at the base of the bag; one providing air into the bag through  
20 a charcoal filter cartridge (1 L/min.) to remove any contaminants from the pump or the  
21 surrounding air, and the other tube pulling the air out of the bag (1 L/min.) through a headspace  
22 trap composed of a borosilicate Pasteur pipette (VWR, Radnor, PA, USA) containing 50 mg of  
23 Porapak powder Q 80-100 mesh (Waters Corporation, Milford, MA, USA). This amount of  
24 Porapak was calibrated for collecting the orchid headspace without bleed through. The tubes  
25 were connected to a diaphragm pump (Diaphragm pump 400-1901, Barnant Co., Barrington, IL,  
26 USA for the greenhouse VOCs collection; Diaphragm pump 10D1125-101-1052, Gast, Benton  
27 Harbor, MI, USA, for the field VOCs collection connected to a Power-Sonic PS-6200 Battery,  
28 M&B's Battery Company). Immediately after headspace collection, traps were eluted with 600  $\mu$ L  
29 of 99% purity hexane (Sigma Aldrich, Saint-Louis, MO, USA). The samples were sealed and  
30 stored in 2 mL amber borosilicate vials (VWR, Radnor, PA) with Teflon-lined caps (VWR,  
31 Radnor, PA) on ice until reaching the laboratory, where they were stored at -80°C until analysis  
32 by GCMS. Because some orchid species are pollinated by nocturnal moths (e.g., *P. dilatata*),  
33 whereas others are pollinated by diurnal insects (e.g., *P. obtusata*), we elected to normalize  
34 collections across *Platanthera* species for an entire 24 h period, excepting those of *P. ciliaris*  
35 which was collected for 72 h to account for the chemical analyses and relative abundance in the  
36 scent. For headspace controls, samples were taken concurrently from empty oven bags and from  
37 the leaves of the plants (as vegetation-only controls). 7-39 floral headspace collections were  
38 conducted for each orchid species for a total of 109 floral headspace samples.

39

40 **Gas Chromatography with Mass Spectrometric Detection of the orchid scents:** One to three  
41 microliters of each sample were injected into an Agilent 7890A GC and a 5975C Network Mass  
42 Selective Detector (Agilent Technologies, Palo Alto, CA, USA). A DB-5 GC column (J&W

43 Scientific, Folsom, CA, USA; 30 m, 0.25 mm, 0.25  $\mu$ m) was used, and helium was used as the  
44 carrier gas at a constant flow of 1 cc/min. For runs with the DB-5 column, the oven temperature  
45 was 45° for 4 min, followed by a heating gradient of 10° to 230°, which was then held  
46 isothermally for 6 min. The total run time was 28.5 min. A Cyclosil-B column (J&W Scientific,  
47 Folsom, CA, USA; 30 m, 0.25 mm, 0.25  $\mu$ m) was used to examine the stereoisomer composition  
48 of the lilac aldehyde in the floral scents. For the chiral column, the oven temperature was 45° for  
49 6 min, followed by a heating gradient of 5° to 160°, then 15° to 200° which was then held  
50 isothermally for 5 min. The total run time was 36.7 min. Natural lilac aldehydes were isolated  
51 from lilac flowers (*Syringa vulgaris*) to create a natural standard, because lilac flowers are  
52 known to contain 4 out of 8 possible lilac aldehyde stereoisomers, all of which have the 5'S  
53 configuration. The natural standard was prepared by purifying the lilac aldehydes from *Syringa*  
54 *vulgaris* flowers by CO<sub>2</sub> extract (Hermitage Oils, Petrognano, IT) using column chromatography  
55 with Silica Gel 60, mesh 230 - 400 (Material Harvest Ltd, Cambridge, UK), and eluted with 90%  
56 hexanes, 10% ethyl acetate. 1  $\mu$ l of the sample was injected into the GCMS with the chiral  
57 column. The lilac aldehyde peaks from *Platanthera* samples were matched with peaks from lilac  
58 aldehyde purified from lilac flower CO<sub>2</sub> extract using the ChemStation software (Agilent  
59 Technologies, Santa Clara, CA, USA). The lilac aldehyde peaks in the samples, and in the  
60 standard purified from lilac flower CO<sub>2</sub> extract were matched based on their retention indices.

61 Chromatogram peaks were then manually integrated using the ChemStation software  
62 (Agilent Technologies, Santa Clara, CA, USA) and tentatively identified by the online NIST  
63 library. Using methods developed in our laboratory for identifying and quantifying volatiles in floral  
64 headspace emissions (2-4), the data from each sample was first run through a custom program  
65 ([https://github.com/cliffmar/GCMS\\_and\\_combine](https://github.com/cliffmar/GCMS_and_combine)) to identify the volatiles based on their Kovats  
66 index and to remove potential contaminants and chemical synonyms for the subsequent  
67 analyses.

68 Synthetic standards at different concentrations (0.5 ng/ $\mu$ l to 1  $\mu$ g/ $\mu$ l) were then run to  
69 identify the peaks further and to quantify the areas for each compound; peaks are presented in  
70 terms of nanograms per hour per inflorescence (Table S3). Results were plotted and analyzed  
71 using a Non-metric multidimensional scaling (NMDS) analysis with a Wisconsin double  
72 standardization and square-root transformation of the emission rates and the Bray-Curtis  
73 dissimilarity index on the proportions using the *vegan* package in R (5). We then performed an  
74 ANOSIM on the data, allowing us to statistically examine differences in chemical composition and  
75 relative abundance between orchid species.

## 77 ***Mosquitoes rearing and colony conditions***

78 ***Field mosquitoes.*** Adult mosquitoes were caught by hand, using plastic containers (BioQuip®  
79 Products, Rancho Dominguez, CA, USA), on the sites where the orchids were located. We also  
80 collected pupae in ponds located in the same areas. The mosquitoes were then brought back to  
81 the lab, maintained in cages (BioQuip® Products, Rancho Dominguez, CA, USA) and placed in  
82 environmental chambers (22 $\pm$ 1°C during the day and 17 $\pm$ 1°C during the night, 60 $\pm$ 10% relative  
83 humidity (RH) and with a 12-12 h light-dark cycle). There, they had access to 10% sucrose *ad*  
84 *libitum*. Before the experiments, the mosquitoes were starved for two days, CO<sub>2</sub> anesthetized  
85 (Flystuff Flypad, San Diego, CA, USA) and identified using standard keys (6, 7). We used the  
86 taxonomic naming convention of Wilkerson et al. (2015) for classifying the field-caught



87 mosquitoes (8). The mosquitoes bearing pollinia were snap frozen in liquid nitrogen for further  
88 analyses.

89  
90 Laboratory mosquito strains. Female *Ae. aegypti* (wild type, MRA-734, ATCC®, Manassas, VA,  
91 USA) and *An. stephensi* (MRA-128, Strain STE2, CDC, Atlanta, GA, USA) mosquitoes were also  
92 used for behavioral experiments. Mosquitoes were kept in an environmental chamber maintained  
93 at  $25 \pm 1^\circ\text{C}$ ,  $60 \pm 10\%$  RH and under a 12-12 h light-dark cycle. Groups of 200 larvae were  
94 placed in 26x35x4cm covered trays containing tap water and were fed daily on fish food (Hikari  
95 Tropic 382 First Bites - Petco, San Diego, CA, USA). Groups of same age pupae (both males  
96 and females) were then isolated in 16 oz containers (Mosquito Breeder Jar, BioQuip® Products,  
97 Rancho Dominguez, CA, USA) until emergence. Adults were then transferred into mating cages  
98 (BioQuip® Products, Rancho Dominguez, CA, USA) and maintained on 10% sucrose. An  
99 artificial feeder (D.E. Lillie Glassblowers, Atlanta, Georgia, USA; 2.5 cm internal diameter) filled  
100 with heparinized bovine blood (Lampire Biological Laboratories, Pipersville, PA, USA) placed on  
101 the top of the cage was heated at  $37^\circ\text{C}$  using a water-bath circulation system (HAAKE A10 and  
102 SC100, Thermo Scientific, Waltham, MA, USA) and used to feed mosquitoes weekly. For the  
103 experiments, groups of 120 pupae were isolated and maintained in their container for 6 days  
104 after their emergence. Mosquitoes had access to 10% sucrose but were not blood-fed before the  
105 experiments. The day the experiments were conducted, mosquitoes were cold-anesthetized  
106 (using a climatic chamber at  $10^\circ\text{C}$ ) and females were selected manually with forceps.

107 *Ae. aegypti PUb-GCaMP6s* mosquitoes (9) used in the calcium imaging experiments  
108 were from the Liverpool strain, which was the source strain for the reference genome sequence.  
109 Briefly, this mosquito line was generated by injecting a construct that included the GCaMP6s  
110 plasmid (ID# 106868) cloned into the piggyBac plasmid pBac-3xP3-dsRed and using *Ae. aegypti*  
111 polyubiquitin (*PUb*) promoter fragment. Mosquito pre-blastoderm stage embryos were injected  
112 with a mixture of the GCaMP6s plasmid described above (200ng/ul) and a source of piggyBac  
113 transposase (phsp-Pbac, (200ng/ul)). Injected embryos were hatched in deoxygenated water and  
114 surviving adults were placed into cages and screened for expected fluorescent markers.  
115 Mosquitoes were backcrossed for five generations to our wild-type stock, and subsequently  
116 screened and selected for at least 20 generations to obtain a near homozygous line. The location  
117 and orientation of the insertion site was confirmed by PCR (see (9) for details).

118 All behavioral and physiological experiments were conducted at times when mosquitoes  
119 were the most active (10, 11).

### 121 **Preparation for Gas Chromatography coupled with Electroantennogram Detection (GC- 122 EADs)**

123 Individual mosquitoes were isolated in falcon™ tubes (Thermo Fisher Scientific, Pittsburgh, PA,  
124 USA) covered with a piece of fine mesh. They were maintained in a climatic chamber, as  
125 previously described, and identified immediately before running the experiment. Carbon dioxide  
126 delivered through a pad (Genesee Scientific, San Diego, CA, USA) was used to briefly  
127 anesthetize mosquitoes before transferring them on ice for the dissection. The head was excised  
128 and the tip (i.e., one segment) of each antenna was cut off with fine scissors under a binocular  
129 microscope (Carl Zeiss, Oberkochen, Germany). The head was then mounted on an electrode  
130 composed of a silver wire 0.01" (A-M Systems, Carlsbord, WA, USA) and a borosilicate pulled

131 capillary (Sutter Instrument Company, Novato, CA, USA) filled with a 1:3 mix of saline<sup>42</sup> and  
132 electrode gel (Parker Laboratories, Fairfield, NJ, USA) in order to avoid the preparation to  
133 desiccate during the experiment. The head was mounted by the neck on the reference electrode.  
134 The preparation was then moved to the GC-EAD with the tips of the antennae inserted under the  
135 microscope (Optiphot-2, Nikon, Tokyo, Japan) into a recording electrode, that was identical to the  
136 reference electrode. The mounted antennae were oriented at 90° from the main airline which was  
137 carrying filtered air (Praxair, Danbury, CT, USA) and volatiles eluting from the Gas-  
138 Chromatograph to the preparation via a 200° C transfer line (EC-05; Syntech GmbH,  
139 Buchenbach, Germany). Five microliters of the orchid extract was injected into the Gas  
140 Chromatograph with Flame Ionization Detection (Agilent 7820A GC, Agilent Technologies; DB5  
141 column, J&W Scientific, Folsom, CA, USA). The oven program was the same as the one used for  
142 the GC-MS analyses of the scent extracts. The transfer line from the GC to the preparation was  
143 set to 200° C.  
144

## 145 **Behavioral experiments**

146 Chemical mixture preparation and single odorants. All the chemicals used for the behavioral  
147 experiments were ordered from Sigma Aldrich (St. Louis, MO, USA)(≥98% purity) with the  
148 exception of the lilac aldehyde (mixture of B [49%], D [26%], and C [23%] isomers) that were  
149 synthesized by Medchem Source LLP (Seattle, WA, USA) according to the methods of Wilkins  
150 et. al. (52). The ratio of D and C isomers approximated those quantified in the *P. obtusata* scent  
151 (Table S3). Briefly, linalool (0.5 mL) was aliquoted in dioxane (2 mL) and subsequently stirred  
152 with selenium dioxide (225 mg) under reflux for approximately 6 h. Afterward the solution was  
153 separated using silica gel yielding 5-dimethyl-5-ethenyl-2-tetrahydrofuranacetaldehydes (lilac  
154 aldehyde, mixture of isomers). Purity was verified by two-dimensional COSY NMR (AC-300,  
155 Bruker, Billerica, MA) and GC-MS (Agilent Technologies, Palo Alto, CA, USA).

156 Stimuli included the scent from live *P. obtusata* flowers; artificial mixture of the *P.*  
157 *obtusata* scent (with or without the lilac aldehyde); the lilac aldehyde at the concentration in the  
158 *P. obtusata* scent mixture; and the negative mineral oil (no odor) control. The artificial mixture  
159 was composed of a 14 component blend of odorants identified as antennal-active (*via* the GC-  
160 EAD experiments)(Table S3): The mixture was prepared by adding each synthetic component  
161 and adjusting so that the headspace concentrations matched those found in the *P. obtusata* floral  
162 headspace (as quantified through GC-MS). Briefly, emission rates of the artificial mixtures and  
163 single compounds were scaled to those of live flowers by their individual vapor pressures and  
164 associated partial pressures, and verified and adjusted by iterative headspace collection and  
165 quantification using the GC-MS (*sensu* (3, 4)).

166 To test the effects of different ratios of lilac aldehyde in the orchid scents, mixtures were  
167 created where the composition and concentration of volatiles were the same as those in the *P.*  
168 *obtusata* scent, except we increased the concentration of the lilac aldehyde to similar levels as  
169 those measured in the scents of *P. stricta*, *P. dilatata*, and *P. huronensis* (Table S3). Finally,  
170 higher tested concentrations of the *P. obtusata* mixture – well beyond those emitted naturally by  
171 *P. obtusata* plants – were significantly aversive to the mosquitoes (binomial tests:  $p < 0.05$ ).  
172

173 Olfactometer. Female *Ae. aegypti* (MRA-734; n = 645 tested and flew; n = 482 made a choice)  
174 and *An. stephensi* (MRA-128; n = 153 tested and flew; n = 73 made a choice) from our laboratory  
175 colonies, and *Ae. increpitus* and *Ae. communis* caught in the field (n = 138 tested), were used for  
176 these experiments. Female mosquitoes were individually selected and checked for the integrity of  
177 their legs and wings to ensure that they would be able to behave properly in the olfactometer.  
178 Females were then individually placed in 50 mL conical Falcon™ tubes (Thermo Fisher Scientific,  
179 Pittsburgh, PA, USA) covered by a piece of mesh maintained by a rubber band.

180 A custom-made Y-maze olfactometer made from Plexiglas® was used to compare  
181 behavioral response of the mosquitoes to different odor stimuli. The olfactometer is comprised of  
182 a starting chamber where the mosquitoes were released, a tube (length: 30 cm; diameter 10 cm)  
183 connected to a central box where two choice arms of equal length (39 cm) and diameter (10 cm)  
184 were attached. Fans (Rosewill, Los Angeles, CA, USA) placed inside a Plexiglas® box were  
185 connected to the two arms of the olfactometer. The fans generate airflows of 20 cm/s. The air  
186 first passes through a charcoal filter (C16x48, Complete Filtration Services, Greenville, NC, USA)  
187 to remove any odor contaminants that may be in the ambient air. The filtered air then passes  
188 through a mesh screen and an aluminum honeycomb core (10 cm in thickness) to create a  
189 laminar flow within the olfactometer. Odor delivery to each choice arm is made using an  
190 aquarium pump adjusted with flow meters (Cole-Parmer, Vernon Hills, IL, USA). Air lines  
191 (Teflon® tubing; 3 mm internal diameter) were connected to one of two 20 mL scintillation vials  
192 containing the odor stimulus or control (mineral oil). Odor stimuli were deposited on Whatman®  
193 Grade 1 Filter Paper (32 mm diameter, VWR International, Radnor, PA USA) cut into strips (1 cm  
194 x 5 cm). Each line was connected to the corresponding choice arm of the olfactometer and  
195 placed at about 4 cm from the fans so that the tip of the tubing was centered in the air flow  
196 generated by the fans, and flow through the tubes was approximately 5 mL/min. To ensure the  
197 odor stimuli did not decrease in concentration over the course of the experiment, the odor-laden  
198 filter papers were replaced every 20 to 25 minutes and verified by SPME and GCMS. All the  
199 olfactometer experiments were conducted in a well-ventilated environmental chamber  
200 (Environmental Structures, Colorado Springs, CO, USA) maintained at 25°C and 50-70% RH.  
201 After each experiment, the olfactometer, tubing and vials were sequentially cleaned with 70%  
202 and 95% ethanol and dried overnight to avoid any contamination between experiments. Finally,  
203 to control for any directional biases, the control- and odor-bearing arms of the olfactometer were  
204 randomized between experiments. A Logitech C615 webcam (Logitech® Newark, CA, USA)  
205 mounted on a tripod and placed above the olfactometer was used to record the mosquito activity  
206 during the entire experiment.

207 The experiment began when one single mosquito was placed in the starting chamber.  
208 The mosquito then flew along the entry tube and, at the central chamber, could choose to enter  
209 one of the olfactometer arms, one emitting the odor and the other the “clean air” (solvent only)  
210 control (11). We considered the first choice made by mosquitoes when they crossed the entry of  
211 an arm. Mosquitoes that did not choose or did not leave the starting chamber were considered as  
212 not responsive and discarded from the preference analyses. In addition, to ensure that  
213 contamination did not occur in the olfactometer and to test mosquitoes’ responses to innately  
214 attractive, mosquitoes were placed in the olfactometer and exposed to either two clean air  
215 currents (neutral control). Overall, approximately 60% of the females were motivated to leave the  
216 starting chamber of the olfactometer and choose between the two choice arms.

217 Binary data collected in the olfactometer were analyzed and all statistical tests were  
218 computed using R software (R Development Core Team (13)). Comparisons were performed by  
219 means of the Exact Binomial test ( $\alpha=0.05$ ). For each treatment, the choice of the mosquitoes in  
220 the olfactometer was either compared to a random distribution of 50% on each arm of the maze  
221 or to the distribution of the corresponding control when appropriate. For binary data, the standard  
222 errors (SE) were calculated as in (11):  
223

$$224 \quad SEM = \left( \frac{p(1-p)}{n} \right)^{\frac{1}{2}}$$

225  
226 For each experimental group, a preference index (PI) was computed in the following way:  
227  $PI = [(\text{number of females in the test arm} - \text{number of females in the control arm}) / (\text{number of}$   
228  $\text{females in the control arm} + \text{number of females in the test arm})]$ . A PI of +1 indicates that all the  
229 mosquitoes chose the test arm, a PI of 0 indicates that 50% of insects chose the test arm and  
230 50% the control arm, and a PI of -1 indicates that all insects chose the control arm of the  
231 olfactometer (11).  
232

### 233 ***Two photon experiments***

234 *Glomerular registration from two photon experiments.* We initially attempted to register glomeruli  
235 using a previously published AL atlas (14), but the number, position and size of glomeruli from  
236 our imaging experiments did not always match those of the previous study. We thus created a  
237 provisional atlas with female mosquitoes ( $n = 6$ ) that allowed us to cross-reference the imaged  
238 glomeruli and compare their positions and structures to those described in (14). This was  
239 accomplished via clear glomerular boundaries, especially during odor stimulation, and the distinct  
240 odorant tuning of glomeruli throughout the depths of the AL (e.g., AM2 responsive to DEET; LC2  
241 and AL3 responsive to nonanal; PD3 responsive to geosmin; and MD2 responsive to CO<sub>2</sub>) that  
242 allowed 3D registration across preparations and subsequent warping and referencing with the  
243 atlas. Based on these results we tentatively assigned glomerular names. Nonetheless, future  
244 work will be needed to enable the olfactory receptor inputs to their cognate glomeruli.  
245 Fortunately, thanks to the recent development of new genetic tools (9, 15, 16), these types of  
246 experiments will soon be possible.

247 *Saline and pharmacological agents.* The saline was made based on the Beyenbach and Masia  
248 recipe (17) and contained 150.0 mM NaCl, 25.0 mM N-2-hydroxyethyl-piperazine-N'-2-  
249 ethanesulfonic acid (HEPES), 5.0 mM sucrose, 3.4 mM KCl, 1.8 mM NaHCO<sub>3</sub>, 1.7 mM CaCl<sub>2</sub>,  
250 and 1.0 mM MgCl<sub>2</sub>. The pH was adjusted to 7 with 1 M NaOH. Immediately before the  
251 experiment, GABA receptor antagonists were dissolved in saline (1  $\mu$ M Picrotoxin (Sigma-  
252 Aldrich, St. Louis, MO; P1675), and 10  $\mu$ M CGP54626 (Tocris Bioscience, Park Ellisville, MO;  
253 CGP 54626); to block both GABA-A and GABA-B receptors). A drip system comprising two 100  
254 mL reservoirs – one containing the GABA receptor antagonists, and the other saline – converged  
255 on the two-channel temperature controller to facilitate rapid switching from normal physiological  
256 saline solution to the antagonists and back. Antagonists were superfused directly into the holder  
257 near to the opening of the head capsule and recorded neuropil. The odor-evoked responses  
258 were first recorded under normal physiological saline solution and then repeated under GABA

259 receptor antagonists diluted in normal saline solution, and finally the normal saline wash. All  
260 calcium imaging data were statistically analyzed using Kruskal-Wallis tests with multiple  
261 comparisons and visualized using Principal Components Analysis. Analyses were performed in  
262 Matlab (v2017; Mathworks, Natick, Massachusetts).

263 ***Olfactory delivery and stimuli.*** Olfactory stimuli were delivered to the mosquito by pulses of air  
264 diverted through a 2 mL cartridge containing a piece of filter paper bearing the odor stimulus (2  
265  $\mu$ L). An airline provided gentle and constant charcoal-filtered air at 1 m/s to the antennae  
266 allowing continuous ventilation to prevent adaptation of the olfactory receptor cells. The stimulus  
267 output was positioned in the airline 2 cm from and orthogonal to the mosquito antennae. For  
268 testing different ratios of lilac aldehyde and nonanal, two syringes bearing different  
269 concentrations of the odorants were used and positioned such that the outputs were positioned  
270 in the same location in the air stream. Pulses of odor, each at a duration of two seconds and at a  
271 flow rate of approximately 5 ml/min., were delivered to the antennae using a solenoid-activated  
272 valve (The Lee Company, Essex, CT, USA, LHDA0533115H) controlled by the PrairieView  
273 software. Odor stimuli were separated by intervals of 120 s to avoid receptor adaptation. The  
274 two-way valve enabled a constant airstream with minimal disturbance during odor stimulation.  
275 Odorants (>98% purity; Sigma-Aldrich, St. Louis, MO, USA) were diluted in mineral oil to scale  
276 the intensities to those quantified in the *P. obtusata* scent, except for DEET (N,N-diethyl-meta-  
277 toluamide)(1-40% concentrations) which was diluted in 200 proof ethanol, and each cartridge  
278 used for no more than 4 stimulations. Olfactory stimuli were: aliphatics (nonanal [220 ng], octanal  
279 46 ng], hexanal [9 ng], 1-octanol [0.5 ng]); monoterpenes ( $\alpha$ -pinene [1.44 ng],  $\beta$ -pinene [1.5],  
280 camphene [1.41 ng],  $\beta$ -myrcene [3.5 ng], D-limonene [16.5 ng], eucalyptol [3.4 ng], lilac aldehyde  
281 (B, C and D isomers) [124.7 ng], ( $\pm$ )linalool [1.41 ng], and myrtenol [1.35 ng]); aromatics  
282 (benzaldehyde [1.45 ng], DEET [10%]); and mixtures, including human scent, the *P. obtusata*  
283 mixture, the *P. stricta* mixture, the *P. dilatata* mixture, and the *P. huronensis* mixture. Similar to  
284 behavioral experiments, for experiments examining the effects of lilac aldehyde in the flower  
285 mixtures (Fig. 4C,D), the odor constituents were kept the same except for the lilac aldehyde,  
286 which was scaled to the headspace concentrations of *P. strica*, *P. huronensis*, or *P. dilatata*. This  
287 provided a mechanism to determine how the change of one odorant concentration in the mixture  
288 impacted the activation or suppression of glomeruli in the ensemble. Importantly, all odorant  
289 constituents and floral mixtures were at the same headspace concentration levels as the natural  
290 floral scents or scent constituents, as verified by headspace collections and quantification using  
291 the GC-MS.

292 Human scent samples were collected by gently rubbing Whatman filter paper on the  
293 ankles and wrists of one human volunteer per experiment. Prior to human scent collection,  
294 volunteers placed their ankles and wrists over running water for ten minutes. The human scent  
295 protocols were reviewed and approved by the University of Washington Institutional Review  
296 Board, and all volunteers gave their informed consent to participate in the research. Control  
297 solvents for the olfactory stimuli were mineral oil (for the majority of odorants and mixtures) and  
298 ethanol (for DEET).

### 300 ***Immunohistochemistry***

301 To register putative glomeruli in our calcium imaging experiments, we created an AL atlas using  
302 antiserum against tyrosine hydroxylase (ImmunoStar, Hudson, WI, USA - Cat. no. 22941; 1:50



303 concentration), GABA (Sigma-Aldrich, St. Louis, MO, USA - Cat. no. A2052; 1:100 concentration)  
304 and monoclonal antisera against alpha-tubulin (12G10; 1:1000 concentration; developed by Drs.  
305 J. Frankel and E.M. Nelsen). In addition, to characterize the expression of GCaMP in different  
306 cell types in the AL, we also double-stained for GFP (for the GCaMP6s; Abcam, Cambridge, MA,  
307 USA – Cat. no. ab6556; 1:1000 concentration) and glutamine synthase (GS; a glial marker;  
308 Sigma-Aldrich, St. Louis, MO, USA - Cat. no. MAB302; 1:500 concentration); and GABA and GS.  
309 The alpha-tubulin antiserum was obtained from the Developmental Studies Hybridoma Bank  
310 developed under the auspices of the NICHD and maintained by the University of Iowa,  
311 Department of Biology (Iowa City, IA). These antisera either provide clear designation of  
312 glomerular boundaries, allowing 3D reconstruction of individual glomeruli, or designation of glial-,  
313 GABA-, and GFP-stained cells and processes. Briefly, animals were immobilized by refrigeration  
314 at 4° C and heads were removed into cold (4° C) fixative containing 4% paraformaldehyde in  
315 phosphate-buffered saline, pH 7.4 (PBS, Sigma-Aldrich, St. Louis, MO, USA -Cat. No. P4417).  
316 Heads were fixed for 1 h and then brains were dissected free in PBS containing 4% Triton X-100  
317 (PBS-TX; Sigma-Aldrich, St. Louis, MO, USA - Cat. No. X100). Brains were incubated overnight  
318 at 4° C in 4% PBS-TX. Brains were washed three times over 10 minutes each in 0.5% PBS-TX  
319 and then embedded in agarose. The embedded tissue was cut into 60 µm serial sections using a  
320 Vibratome and washed in PBS containing 0.5% PBS-TX six times over 20 minutes. Then 50 µL  
321 normal serum was added to each well containing 1,000 µL PBS-TX. After 1 hour, primary  
322 antibody was added to each well and the well plate was left on a shaker overnight at room  
323 temperature. The next day, sections were washed six times over 3 h in PBS-TX. Then 1,000-µL  
324 aliquots of PBS-TX were placed in tubes with 2.5 µL of secondary Alexa Fluor 488 or Alexa Fluor  
325 546-conjugated IgGs (ThermoFisher Scientific, Waltham, MA, USA) and centrifuged at 13,000  
326 rpm for 15 minutes. A 900-µL aliquot of this solution was added to each well, and tissue sections  
327 were then washed in PBS six times over 3 h, embedded on glass slides in Vectashield (Vector  
328 Laboratories, Burlingame, CA, USA - Cat. No. H-1000) and imaged using a Leica SP5 laser  
329 scanning confocal microscope. Images were processed using ImageJ (National Institutes of  
330 Health) and a 3D atlas, assembled from 6 mosquitoes, were constructed using the Reconstruct  
331 software (v. 1.1.0.0)(18).



332

333

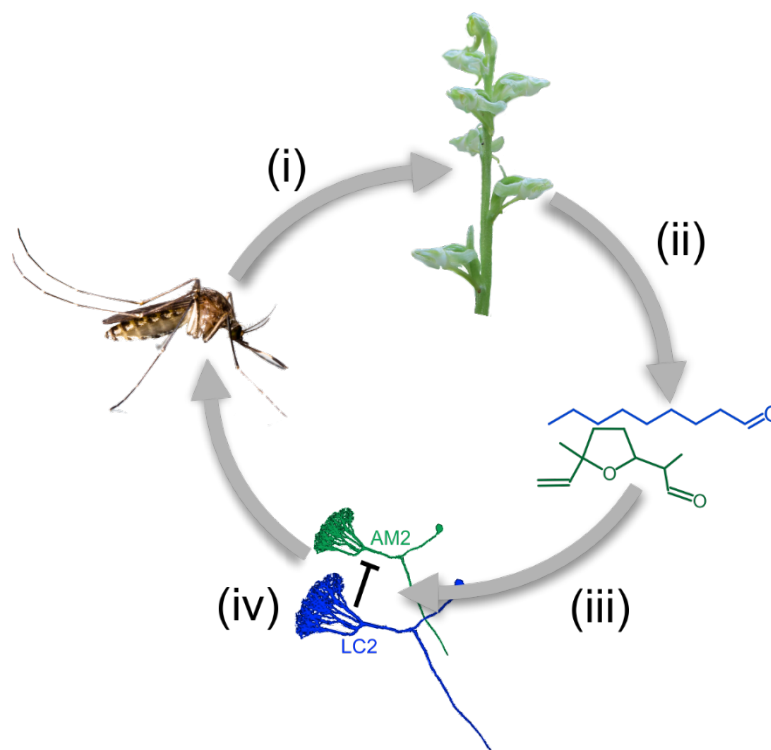

334

335

336 **Fig. S1. Experimental series for determining the olfactory basis of the *Aedes-Platanthera***  
337 **mutualism.** An integrative series of experiments were performed to evaluate the behavioral and  
338 neural bases of the *Aedes-Platanthera* relationship, including: (i) pollination experiments; (ii)  
339 chemical analytical studies of the orchid scents; (iii) identification of antennal responsive  
340 volatiles; and (iv) calcium imaging experiments in the mosquito AL to characterize the  
341 glomerular representations of the orchid scents. Together, these experiments allowed us to test  
342 the working hypothesis that for *Aedes* mosquitoes' certain odorants play critical roles in the  
343 detection and discrimination of floral scents, and inhibition in the AL is essential for scent  
344 discrimination.

345

346

347

348

349

350

351

352

353

354

355

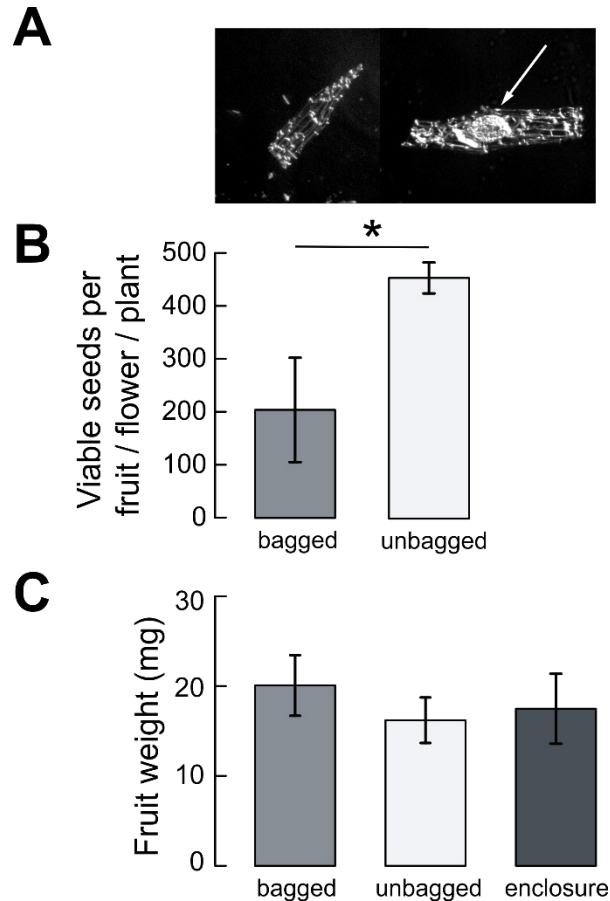

356

357 **Fig. S2. Seed set and fruit weight for *P. obtusata* pollen limitation and enclosure**  
358 **experiments. (A)** *P. obtusata* fruits were opened and viable seeds identified by the identifying  
359 the embryo within the seed capsule (arrow). **(B)** The number of viable seeds per flower per plant  
360 for bagged and unbagged plants. Bars are the mean  $\pm$  SEM; asterisk denotes significant  
361 difference between treatments (Student's *t* test:  $p < 0.05$ ). **(C)** Fruit weights for plants in the  
362 unbagged, bagged, and enclosure treatments. Bars are the mean  $\pm$  SEM; there was no  
363 significant different between treatments (Student's *t* test:  $p > 0.05$ ).

364

365

366

367

368

369

370

371

372

373  
374  
375  
376

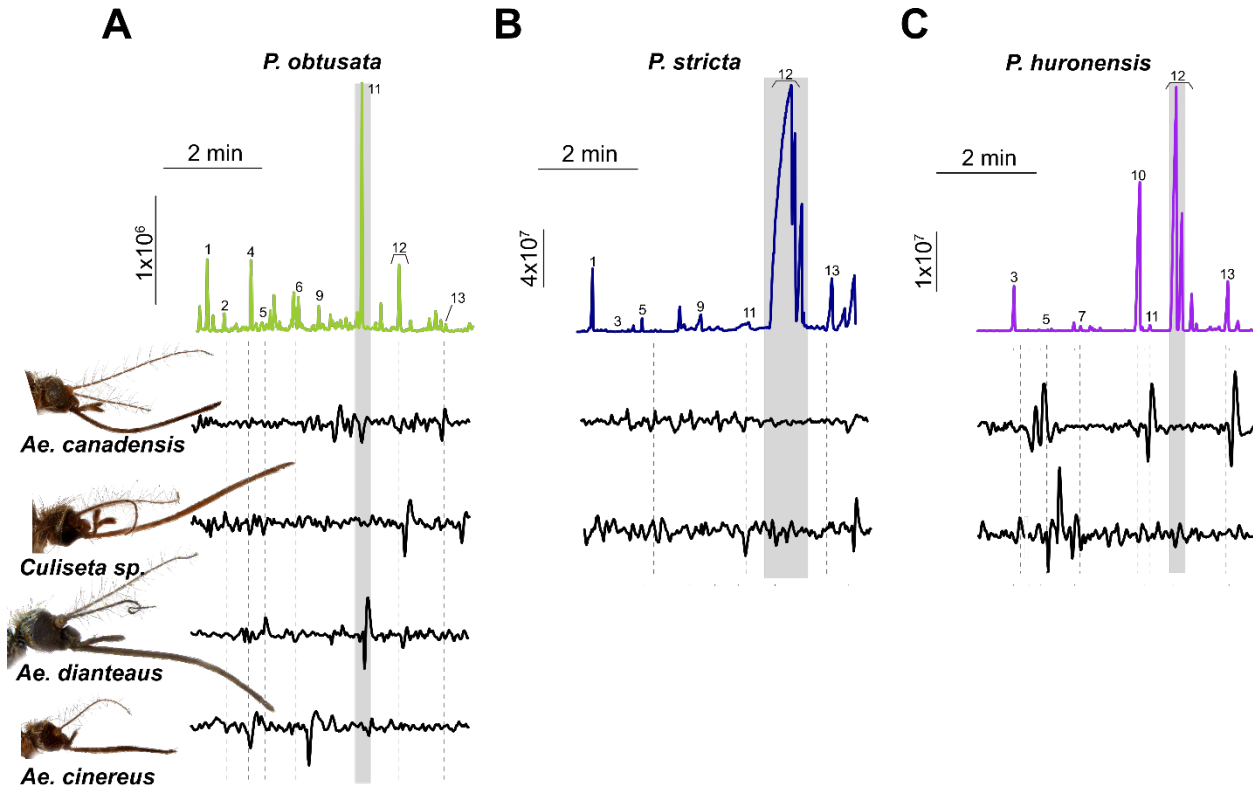

377  
378  
379  
380  
381  
382  
383  
384  
385  
386  
387

**Fig. S3. Identification of antennal responsive orchid volatiles in mosquitoes.** As in Figure 2, Gas chromatogram traces for the *P. obtusata* (A), *P. stricta* (B), and *P. huronensis* (C) headspaces, with individual electroantennogram responses to the GC peaks for four mosquito groups (*Ae. canadensis*, *Culiseta sp.*, *Ae. dianteaus*, and *Ae. cinereus*) below. (1)  $\alpha$ -pinene, (2) camphene, (3) benzaldehyde, (4)  $\beta$ -pinene, (5)  $\beta$ -myrcene, (6) octanal, (7) D-limonene, (8) eucalyptol, (9) 1-octanol, (10) linalool, (11) nonanal, (12) lilac aldehyde (C, D isomers), (13) lilac alcohol. For each species, electroantennogram responses from each individual mosquito are shown in Figure 2B ( $n=3-16$  mosquitoes per species).

388

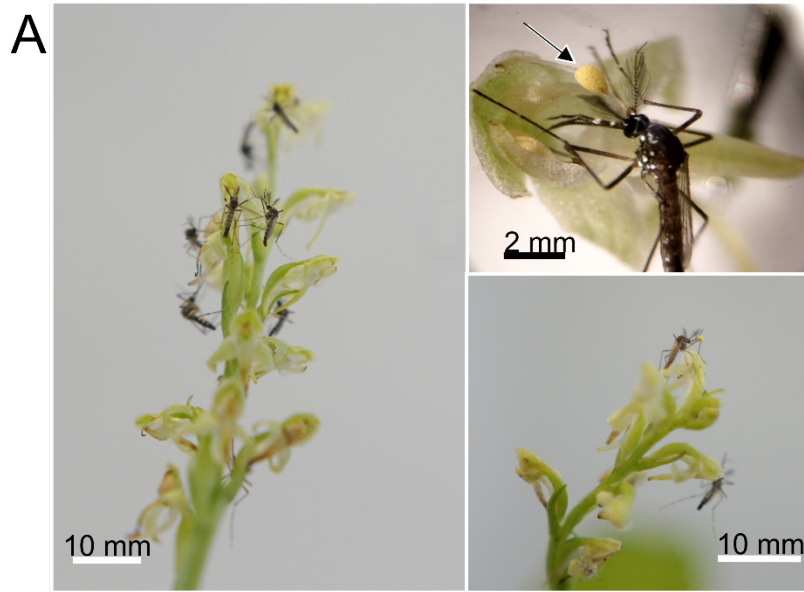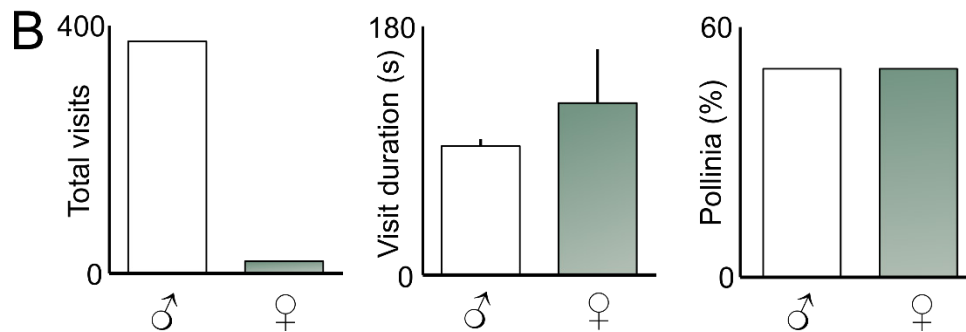

389 **Fig. S4. *Ae. aegypti* orchid visitation and pollinia attachment.**

390 50 *Ae. aegypti* were released into enclosures containing a plant (n = 3; with 21 total flowers).

391 Mosquito-orchid observations were taken by video or direct observations for approximately 5h.

392 (A) Once released into the enclosure, both male and female *Ae. aegypti* mosquitoes landed and  
393 began probing the flowers and inserting their proboscis into the nectar spur. Similar to *Ae.*

394 *communis* and *Ae. increpitus*, after insertion the pollinia would often be attached to the eye  
395 (arrow points to pollinia).

396 (B) The total number of *Ae. aegypti* plant visits (left), visit duration  
397 (middle), and percentage of pollinia attachment for male and female mosquitoes. Although more  
398 male mosquitoes visited the *P. obtusata* plant, there was no statistical difference in the visit  
399 duration ( $t$ -test:  $p < 0.05$ ) or pollinia attachment (binomial test:  $p = 0.5$ ).

399

400

401

402

403

404

405

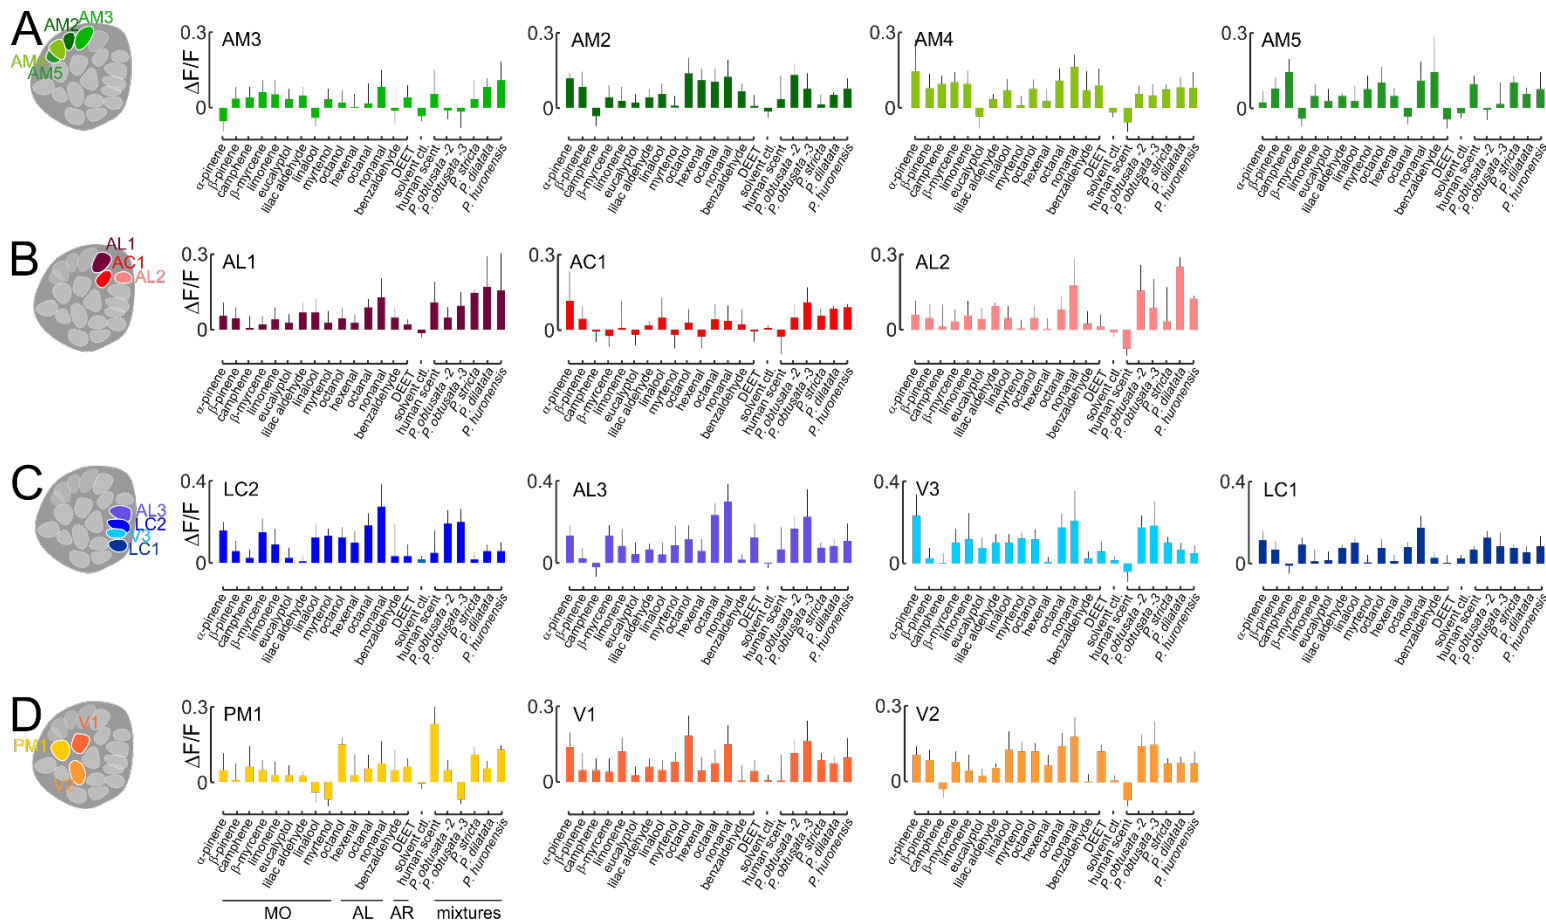

406

407

408

409

410

411

412

413

414

**Fig. S5. *Ae. increpitus* glomerular responses to odors.** Using a  $\Delta F/F$  threshold of 0.15, 14 of the 22 glomeruli imaged from the *Ae. increpitus* mosquito AL elicited strong responses to a panel of odorants identified in the *P. obtusata* headspace, DEET (another bioactive odorant), mixtures including the orchid scents and human scent, and the mineral oil (no odor) control. Odorants of the different chemical classes elicited distinct responses in glomeruli (Kruskal-Wallis test:  $p < 0.005$ ), and glomerular clusters were significantly different in their responses ( $p < 0.001$ ). **(A)** (Left) Location of the imaged glomeruli within the imaging plane. Glomeruli were assigned names similar to those of *Ae. aegypti* based on their position and morphology. (Right) Responses of the AM2, AM3, AM4 and AM5 glomeruli to odor stimuli. Bars are the mean  $\pm$  SEM ( $n = 5-9$  mosquitoes) **(B)** As in A, except for the AL1, AL2 and AC1 glomeruli. **(C)** As in A, except for the AL3, V3, LC1 and LC2 glomeruli. **(D)** As in A, except for the V1, V2 and PM1 glomeruli.

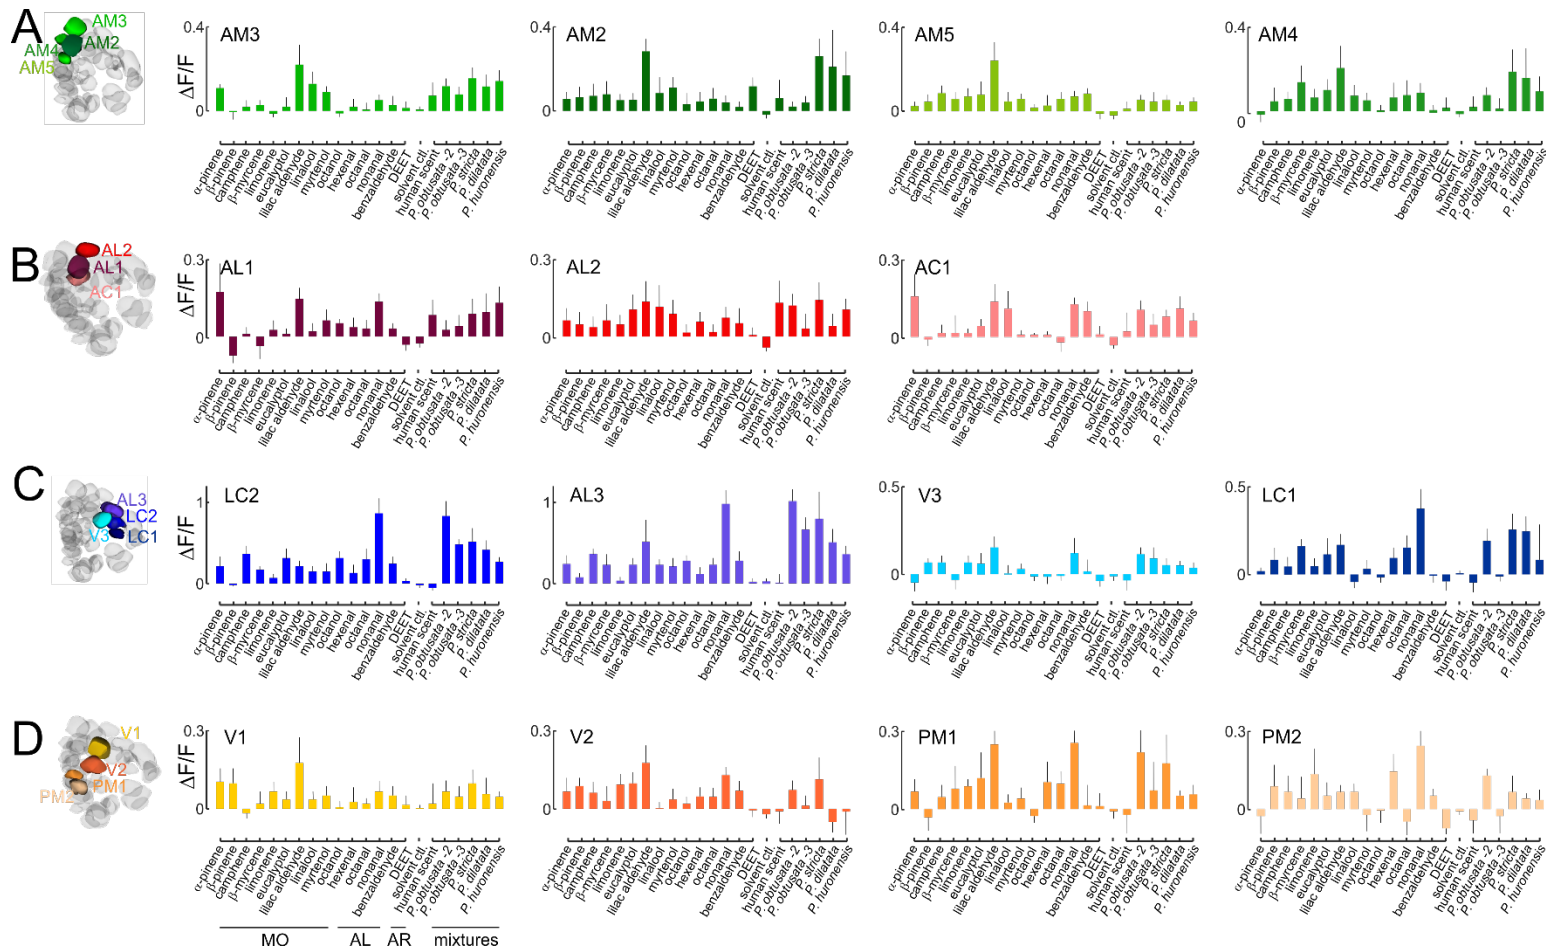

415  
 416 **Fig. S6. *Ae. aegypti* glomerular responses to odors.** As in Figure S5: using a  $\Delta F/F$  threshold of 0.15, 14 of the 18 glomeruli  
 417 imaged from the *Ae. aegypti* AL elicited strong responses to a panel of odorants identified in the *P. obtusata* headspace, DEET  
 418 (another bioactive odorant), mixtures including the orchid scents and human scent, and the mineral oil (no odor) control. Odorants of  
 419 the different chemical classes elicited distinct responses in glomeruli (Kruskal-Wallis test:  $p < 0.001$ ) and glomerular clusters were  
 420 significantly different in their response ( $p < 0.0001$ ). (A) (Left) 3D reconstruction of the *Ae. aegypti* AL and location of the imaged  
 421 glomeruli. Glomeruli were assigned names based on (14). (Right) Responses of the AM2, AM3, AM4 and AM5 glomeruli to odor  
 422 stimuli. Bars are the mean  $\pm$  SEM ( $n = 7-14$  mosquitoes). (B) As in A, except for the AL1, AL2 and AC1 glomeruli. (C) As in A, except  
 423 for the AL3, V3, LC1 and LC2 glomeruli. (D) As in A, except for the V1, V2, PM1 and PM2 glomeruli.



424

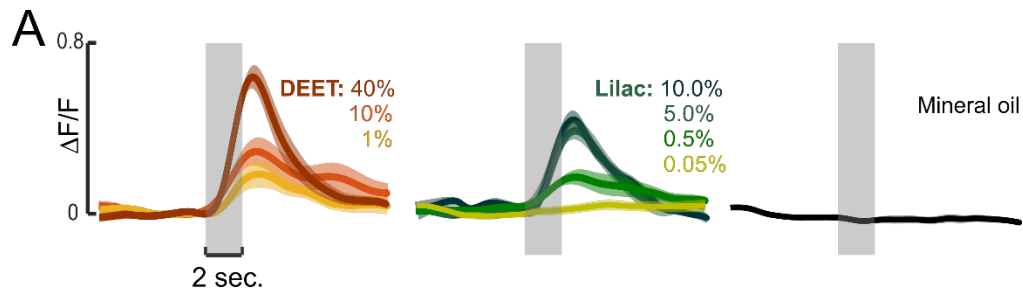

425

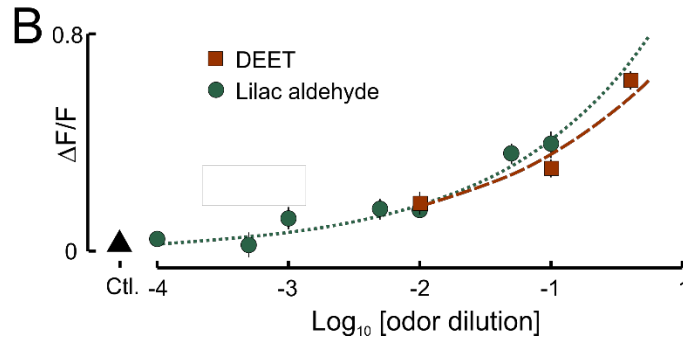

426 **Fig. S7. *Ae. aegypti* AM2 responses to lilac aldehyde and DEET at different**  
427 **concentrations. (A)**  $\Delta F/F$  time traces for the AM2 glomerulus stimulated at different  
428 concentrations of DEET (left, brown), lilac aldehyde (middle, green), and the mineral oil control.  
429 Lines are the mean; shaded areas are the SEM (n=4-10 mosquitoes). (B) Dose-response  
430 curves for AM2 responses to DEET and lilac aldehyde. Both odorants elicited significant  
431 increases in response with increasing dose ( $R^2 \geq 0.75$ ;  $p < 0.05$ ) and were not significantly  
432 different in their model fits ( $p = 0.06$ ) (lilac aldehyde:  $y = 1.01x^{0.39}$ ; DEET:  $y = 0.77x^{0.33}$ ).  
433

434

435

436

437

438

439

440

441

442

443

444

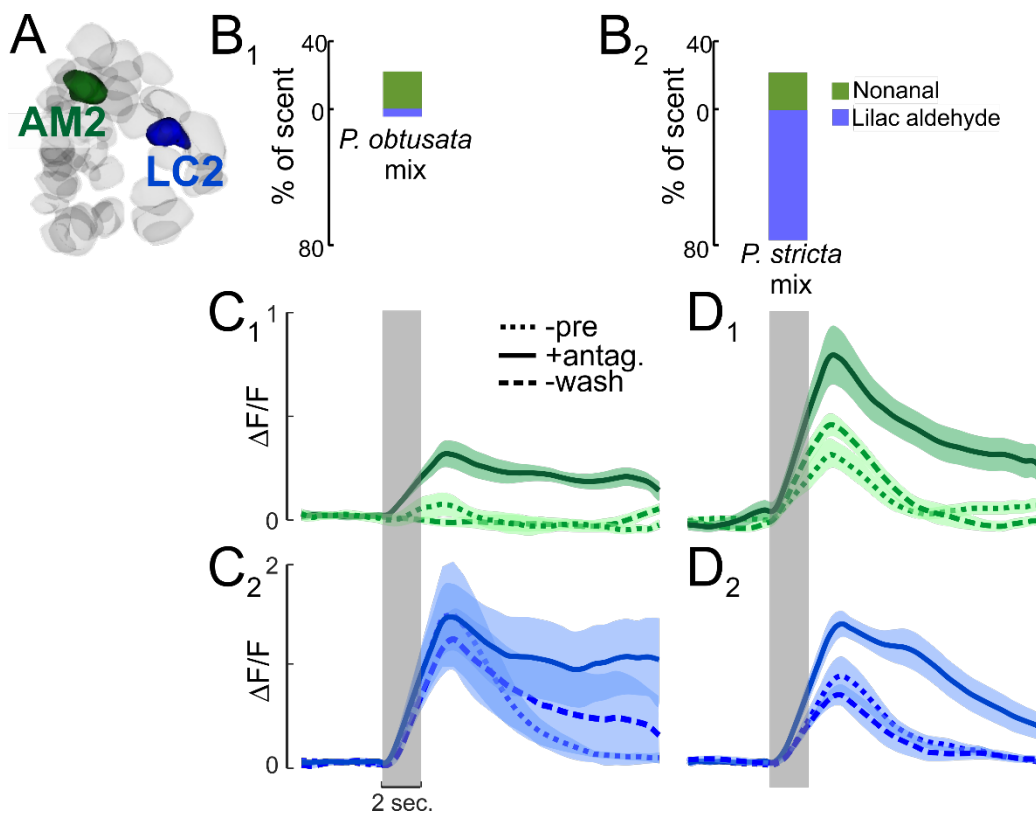

445

446 **Fig. S8.  $\Delta F/F$  time traces of AM2 and LC2 responses to *P. obtusata* and *P. stricta* mixtures**  
447 **during GABA receptor antagonist application.**

448 (A) *Ae. aegypti* AL reconstruction showing LC2 (blue) and AM2 (green) glomeruli. (B) Ratio of  
449 nonanal and lilac aldehyde in the *P. obtusata* (B<sub>1</sub>) and *P. stricta* (B<sub>2</sub>) mixtures. (C) AM2 (C<sub>1</sub>,  
450 green) and LC2 (C<sub>2</sub>, blue) responses to the *P. obtusata* mixture during (pre)saline superfusion  
451 (dotted lines), GABA receptor antagonist application (solid lines), and saline wash (dashed  
452 lines). AM2 responses were significantly modified by application of the GABA receptor  
453 antagonists (Kruskal-Wallis test:  $p < 0.01$ ), but LC2 responses were not significantly different  
454 between pharmacological treatments (Kruskal-Wallis test:  $p = 0.98$ ). Each trace is the mean;  
455 areas around the traces are the  $\pm$  SEM ( $n = 8$  stimulations from 4 mosquitoes). (D) As in C, but  
456 AM2 (D<sub>1</sub>) and LC2 (D<sub>2</sub>) responses to the *P. stricta* mixture during (pre)saline superfusion (dotted  
457 lines), GABA receptor antagonist application (solid lines), and saline wash (dashed lines). Both  
458 AM2 and LC2 responses were significantly modified by GABA receptor antagonist application  
459 (Kruskal-Wallis test:  $p < 0.05$ ).

460

461

462

463

464

465

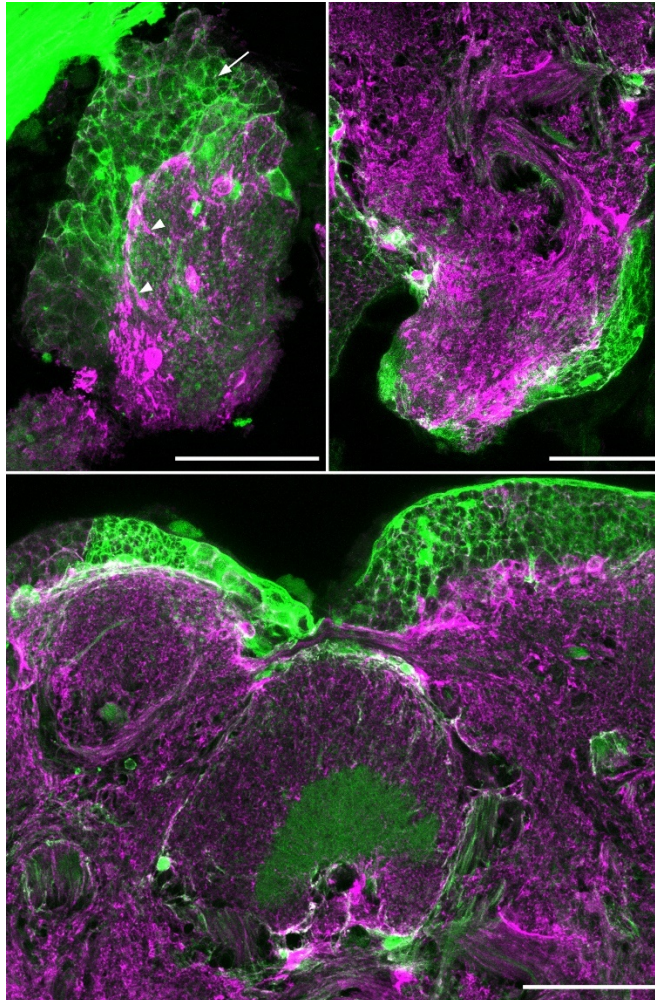

466

467 **Fig. S9. Confocal images brain sections stained for GFP (GCaMP) and glutamate**  
468 **synthase (glia).** Confocal images of brain sections from *P<sub>U<sub>B</sub></sub>-GCaMP6s Ae. aegypti*. (*Upper*  
469 *left*) In the AL, GFP immunofluorescence (green) reveals expression of GCaMP6s, which does  
470 not overlap with glia, labeled with antisera against glutamate synthase (GS, magenta). Arrow in  
471 upper left panel indicates neuronal cell bodies in the lateral antennal lobe cluster. (*upper right*)  
472 The Mushroom Body Calyx; and (*Lower center*) the Central Complex. Scale bars are 100  $\mu$ m.

473

474 **Table S1. *Platanthera* spp. morphological traits and pollinators.**

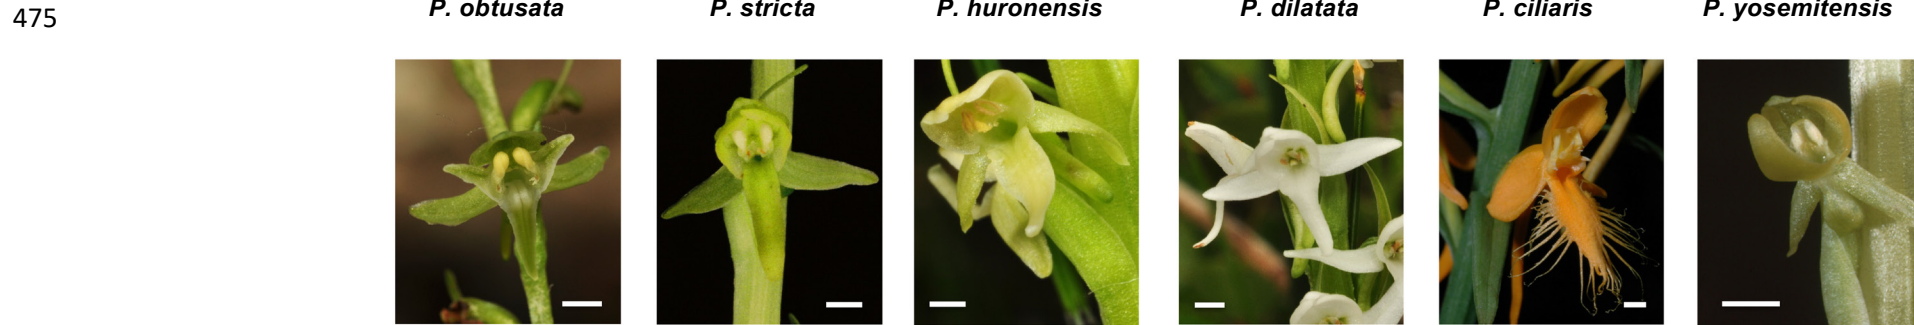

476

|                                 |                          |                                 |                                  |                                |                           |                     |
|---------------------------------|--------------------------|---------------------------------|----------------------------------|--------------------------------|---------------------------|---------------------|
| <b>Common name:</b>             | Blunt-leaved rein orchid | Slender bog orchid              | Green bog orchid                 | Tall white northern bog orchid | Orange fringed orchid     | Yosemite bog orchid |
| <b>Number of flowers:</b>       | 9-15                     | 20-40                           | 20 -75+                          | 20-100+                        | 10-100+                   | 30-50               |
| <b>Color:</b>                   | yellowish-green          | green                           | greenish-white                   | white                          | orange                    | yellow              |
| <b>Diameter of flower (cm):</b> | 1 not including the spur | 0.75-2 (not including the spur) | 1.75-2 (not including the spur)  | 1.75-2                         | 0.8-2                     | 0.5-1               |
| <b>Length of spur (cm):</b>     | 0.3-1                    | 0.2-0.4                         | 0.4-1.2                          | as long as the lip             | 2-3.5                     | 2-2.8               |
| <b>Size of plant (cm):</b>      | 15-37                    | 30-100+                         | 10-100+                          | 25-100+                        | 24-100+                   | 20-80               |
| <b>Habitat:</b>                 | woodlands, wet meadows   | Open wet meadows, bogs          | Open wet meadows, bogs           | Open wet meadows, bogs         | Moist, sunny open meadows | Meadows             |
| <b>Pollinators:</b>             | mosquitoes / moths       | bees / butterflies              | moths / bees / flies /autogamous | butterflies and moths          | butterflies and moths     | fly                 |

477

|                                           |                     |                      |                              |                  |                               |                         |
|-------------------------------------------|---------------------|----------------------|------------------------------|------------------|-------------------------------|-------------------------|
| <b>References:</b>                        | Thien, 1969(20)     | Patt et al. 1989(21) | Catling and Catling 1989(22) | Boland 1993(23)  | Smith and Snow 1976(24)       | Colwell et al. 2007(25) |
| For all descriptions, see Brown, 2006 (1) | Dexter 1913(19)     |                      | Reddoch and Reddoch 1997(26) | Gray 1862(28)    | Robertson and Wyatt 1990 (30) | Personal obs.           |
|                                           | Gorham 1976(67)     |                      |                              | Kipping 1971(29) |                               |                         |
|                                           | Stoutamire 1968(18) |                      |                              |                  |                               |                         |

478 **Scale bars in images are 2 mm.**

479

480 **Table S2. Mosquito species captured in the field and numbers of individuals found with**  
481 **attached pollinia.**

| Mosquito genus                                     | Mosquito species                 | Individuals caught with pollinia attached |
|----------------------------------------------------|----------------------------------|-------------------------------------------|
| <b><i>Aedes</i></b>                                | <i>Ae. cinereus</i>              | 1                                         |
| <b><i>Aedes</i> (Subgenus <i>Ochlerotatus</i>)</b> | <i>Ae. communis</i>              | 24                                        |
|                                                    | <i>Ae. increpitus</i>            | 9                                         |
|                                                    | <i>Ae. fitchii</i>               | -                                         |
|                                                    | <i>Ae. dianteus</i>              | -                                         |
|                                                    | <i>Ae. canadensis canadensis</i> | 1                                         |
|                                                    | <i>Ae. implicatus</i>            | 1                                         |
|                                                    | <i>Ae. sp.</i>                   | 3                                         |
| <b><i>Culiseta</i></b>                             | <i>Cs. impatiens</i>             | -                                         |
|                                                    | <i>Cs. incidens</i>              | -                                         |
| <b><i>Anopheles</i></b>                            | <i>An. freeborni</i>             | -                                         |
| <b><i>Culex</i></b>                                | <i>Cx. pipiens</i>               | -                                         |

482

483

484

485

486

487

488

489

490

491

492 **Table S3. Composition and emission rates of the *Platanthera* orchid scents.** The values for  
 493 the volatile compounds in the scent of each orchid species are presented as percentages.  
 494 Emission rates are the mean  $\pm$  SD.

|                                                 | <i>P. obtusata</i> | <i>P. dilatata</i> | <i>P. huronensis</i> | <i>P. stricta</i> | <i>P. ciliaris</i> | <i>P. yosemitensis</i> |
|-------------------------------------------------|--------------------|--------------------|----------------------|-------------------|--------------------|------------------------|
| <b>Sample #:</b>                                | 39                 | 21                 | 18                   | 17                | 6                  | 7                      |
| <b>Volatile #:</b>                              | 34                 | 39                 | 31                   | 21                | 11                 | 21                     |
| <b>Emission Rate:<br/>(ng/hr/inflorescence)</b> | 9.1 $\pm$ 13.3     | 36.3 $\pm$ 55.7    | 210.7 $\pm$ 446.6    | 217.4 $\pm$ 455.9 | 2.1 $\pm$ 1.2      | 7.9 $\pm$ 9.5          |

| <b>Aliphatics</b>                    | KRI  |       |       |       |       |       |      |
|--------------------------------------|------|-------|-------|-------|-------|-------|------|
| Hexanal <sup>1,2</sup>               | 782  | 0.63  | -     | -     | -     | 0.67  | -    |
| 2-Hexanone <sup>1</sup>              | 793  | 0.08  | 0.32  | 0.02  | -     | -     | -    |
| Heptanal <sup>1,2</sup>              | 896  | 0.15  | 0.02  | -     | -     | -     | -    |
| Decane <sup>1</sup>                  | 1000 | 4.03  | 0.03  | 0.21  | <0.01 | 36.08 | -    |
| Octanal <sup>1,2</sup>               | 1004 | 1.06  | 0.13  | 0.04  | 0.07  | 2.98  | 1.14 |
| Indane <sup>1</sup>                  | 1036 | 1.22  | 0.05  | 0.06  | -     | -     | -    |
| 1-Octanol <sup>1,2</sup>             | 1072 | 0.45  | -     | -     | <0.01 | -     | -    |
| Nonanal <sup>1,2</sup>               | 1107 | 22.60 | 1.96  | 5.23  | 0.57  | 24.16 | 2.72 |
| 5-Tetradecene <sup>1</sup>           | 1393 | 13.27 | 0.39  | 0.11  | -     | -     | -    |
| 1-Pentadecene                        | 1493 | 7.87  | 0.28  | 5.38  | 1.79  | -     | 7.56 |
| 7-Hexadecene <sup>1</sup>            | 1598 | 3.43  | 0.36  | 0.26  | -     | -     | 0.53 |
| <b>Terpenoids</b>                    |      |       |       |       |       |       |      |
| Terpinene <sup>1</sup>               | 919  | <0.01 | 0.03  | -     | -     | -     | 0.18 |
| $\alpha$ -Pinene <sup>1,2</sup>      | 931  | 2.22  | 0.08  | 0.05  | 7.82  | -     | 1.41 |
| Camphene <sup>1,2</sup>              | 950  | 6.58  | 0.06  | 0.06  | -     | -     | -    |
| $\beta$ -Pinene <sup>1,2</sup>       | 979  | 4.19  | 0.03  | 0.09  | 0.13  | 1.69  | 1.93 |
| $\beta$ -Myrcene <sup>1,2</sup>      | 990  | 1.30  | 0.02  | 0.05  | 1.13  | 6.62  | -    |
| D-Limonene <sup>1,2</sup>            | 1033 | 9.65  | 1.11  | 8.80  | 3.10  | 11.85 | 1.58 |
| $\beta$ -Phellandrene <sup>1,2</sup> | 1034 | 1.10  | 0.01  | -     | -     | -     | 1.23 |
| Eucalyptol <sup>1,2</sup>            | 1037 | 0.09  | 0.03  | -     | -     | 3.95  | -    |
| $\beta$ -Ocimene <sup>1,2</sup>      | 1048 | 0.06  | 0.43  | -     | 0.05  | -     | -    |
| $\pm$ Linalool <sup>1,2</sup>        | 1102 | 3.26  | 9.72  | 28.84 | 0.06  | -     | 0.70 |
| Lilac aldehyde D <sup>1,2,3,4</sup>  | 1146 | 4.56  | 40.91 | 26.61 | 76.43 | -     | -    |
| Verbenol <sup>1</sup>                | 1148 | 0.40  | -     | -     | -     | -     | -    |
| 2-Bornanone <sup>1</sup>             | 1155 | 0.26  | -     | -     | -     | -     | 0.18 |
| Lilac aldehyde C <sup>1,2,3,5</sup>  | 1169 | 1.96  | 7.75  | 2.03  | 3.88  | -     | -    |
| Lilac alcohol B <sup>1,2,3</sup>     | 1194 | 0.15  | 2.06  | 0.03  | <0.01 | -     | -    |
| Lilac alcohol A <sup>1</sup>         | 1194 | 0.28  | 0.04  | 2.35  | 3.31  | -     | -    |
| Myrtenol <sup>1,2</sup>              | 1202 | 0.11  | -     | -     | -     | -     | -    |



|                                      |      |      |       |      |      |      |       |
|--------------------------------------|------|------|-------|------|------|------|-------|
| $\alpha$ -Terpineol <sup>1</sup>     | 1203 | -    | 0.05  | -    | -    | -    | -     |
| Lilac alcohol C <sup>1</sup>         | 1215 | -    | 0.50  | 0.48 | 1.41 | -    | -     |
| Lilac alcohol D <sup>1</sup>         | 1229 | 0.45 | 13.18 | 6.84 | 0.10 | -    | -     |
| <b>Aromatics</b>                     |      |      |       |      |      |      |       |
| <b>Benzaldehyde<sup>1,2</sup></b>    | 963  | 1.72 | 10.72 | 6.11 | 0.04 | 5.98 | 15.91 |
| Benzyl alcohol <sup>1,2</sup>        | 1019 | -    | 1.82  | 0.77 | -    | -    | 0.53  |
| Acetophenone <sup>1,2</sup>          | 1070 | 2.11 | 0.03  | 0.01 | 0.03 | 1.83 | 0.70  |
| Phenylacetaldehyde <sup>1,2</sup>    | 1099 | -    | -     | -    | -    | -    | 34.80 |
| Methyl benzoate <sup>1,2</sup>       | 1101 | -    | 0.17  | -    | -    | -    | -     |
| 2-Phenylethyl alcohol <sup>1,2</sup> | 1110 | -    | 1.44  | 0.58 | -    | -    | 8.35  |
| Methyl nicotinate <sup>1</sup>       | 1144 | -    | -     | -    | -    | -    | 3.16  |
| Ethyl benzoate <sup>1</sup>          | 1156 | -    | 0.61  | 0.54 | -    | -    | -     |
| 3-Ethylbenzaldehyde <sup>1</sup>     | 1169 | 2.62 | 0.05  | 0.09 | 0.09 | 4.20 | 10.19 |
| 4-Ethylbenzaldehyde <sup>1</sup>     | 1186 | 2.09 | 0.71  | 3.45 | 0.01 | -    | 5.54  |
| Methyl salicylate <sup>1,2</sup>     | 1200 | 0.04 | 0.15  | 0.08 | -    | -    | 1.41  |
| Cinnamaldehyde <sup>1,2</sup>        | 1211 | -    | 0.01  | -    | -    | -    | 0.26  |
| Eugenol <sup>1,2</sup>               | 1357 | -    | 0.89  | 0.09 | -    | -    | -     |
| Methyleugenol <sup>1,2</sup>         | 1378 | -    | 0.67  | 0.09 | -    | -    | -     |
| Benzyl benzoate <sup>1,2</sup>       | 1749 | -    | 3.19  | 0.66 | -    | -    | -     |

495 Compounds in bold are those used in the synthetic mixture.

496 <sup>1</sup>NIST Quality Score of >75.

497 <sup>2</sup>Identified by authentic standards.

498 <sup>3</sup>Verified by non-polar (DB5-MS) and chiral (CycloSilB) columns, and identified by comparison to  
499 standards isolated from lilac flowers (*Syringa vulgaris*) and chromatograms from (31).

500 <sup>4</sup>IUPAC name: ( $\beta$ S,2'R,5'S)-2-(5-ethenyl-5-methyloxolan-2-yl)propanal.

501 <sup>5</sup>IUPAC name: ( $\beta$ R,2'R,5'S)-2-(5-ethenyl-5-methyloxolan-2-yl)propanal.

502

## 503 SI References

504

- 505 1. P. M. Brown, S. Folsom, *Wild Orchids of the Pacific Northwest and Canadian Rockies*.  
506 (University Press of Florida 15 NW 15th Street, Gainesville, FL. 32611-2079, 2006).
- 507 2. J. A. Riffell *et al.*, Behavioral consequences of innate preferences and olfactory learning  
508 in hawkmoth–flower interactions. *Proceedings of the National Academy of Sciences* 105, 3404-  
509 3409 (2008).
- 510 3. J. A. Riffell, H. Lei, T. A. Christensen, J. G. Hildebrand, Characterization and coding of  
511 behaviorally significant odor mixtures. *Current Biology* 19, 335-340 (2009).
- 512 4. J. A. Riffell *et al.*, Flower discrimination by pollinators in a dynamic chemical environment.  
513 *Science* 344, 1515-1518 (2014).
- 514 5. J. Oksanen *et al.*, vegan: Community ecology package. *R package version*, 117-118  
515 (2011).
- 516 6. R. Darsie, R. Ward, *Identification and geographical distribution of the mosquitoes of North*  
517 *America, north of Mexico. 2005*. (University Press of Florida, Gainesville, 2005).
- 518 7. A. C. Thielman, F. F. Hunter, *A photographic key to adult female mosquito species of*  
519 *Canada (Diptera: Culicidae)*. (Biological Survey of Canada, 2007).
- 520 8. R. C. Wilkerson *et al.*, Making mosquito taxonomy useful: a stable classification of tribe  
521 Aedini that balances utility with current knowledge of evolutionary relationships. *PLoS one* 10,  
522 e0133602 (2015).
- 523 9. M. Bui *et al.*, Live calcium imaging of *Aedes aegypti* neuronal tissues reveals differential  
524 importance of chemosensory systems for life-history-specific foraging strategies. *BMC*  
525 *Neuroscience*, 20, 1-17 (2019).
- 526 10. M. Trpis, G. McClelland, J. Gillett, C. Teesdale, T. Rao, Diel periodicity in the landing of  
527 *Aedes aegypti* on man. *Bulletin of the World Health Organization* 48, 623 (1973).
- 528 11. C. Vinauger, E. K. Lutz, J. A. Riffell, Olfactory learning and memory in the disease vector  
529 mosquito, *Aedes aegypti*. *Journal of Experimental Biology*, jeb. 101279 (2014).
- 530 12. A. L. Wilkins, Y. Lu, S. T. Tan, Extractives from New Zealand honeys. 4. Linalool  
531 derivatives and other components from nodding thistle (*Carduus nutans*) honey. *Journal of*  
532 *Agricultural and Food Chemistry* 41, 873-878 (1993).
- 533 13. R. C. Team, R: A language and environment for statistical computing. (2014).
- 534 14. R. Ignell, T. Dekker, M. Ghaninia, B. S. Hansson, Neuronal architecture of the mosquito  
535 deutocerebrum. *Journal of Comparative Neurology* 493, 207-240 (2005).
- 536 15. B. J. Matthews, M. A. Younger, L. B. Vosshall, The ion channel ppk301 controls  
537 freshwater egg-laying in the mosquito *Aedes aegypti*. *bioRxiv*, 441592 (2018).
- 538 16. O. Riabinina *et al.*, Organization of olfactory centres in the malaria mosquito *Anopheles*  
539 *gambiae*. *Nature communications* 7, 13010 (2016).

- 540 17. K. Beyenbach, R. Masia, Membrane conductances of principal cells in Malpighian tubules  
541 of *Aedes aegypti*. *Journal of insect physiology* 48, 375-386 (2002).
- 542 18. J. C. Fiala, Reconstruct: a free editor for serial section microscopy. *Journal of microscopy*  
543 218, 52-61 (2005).
- 544 19. J. S. Dexter, Mosquitoes pollinating orchids. *Science* 37, 867-867 (1913).
- 545 20. L. B. Thien, Mosquito pollination of *Habenaria obtusata* (Orchidaceae). *American Journal*  
546 *of Botany* 56, 232-237 (1969).
- 547 21. J. M. Patt, M. W. Merchant, e. R. Williams, B. J. Meeuse, Pollination biology of  
548 *Platanthera stricta* (Orchidaceae) in Olympic National Park, Washington. *American Journal of*  
549 *Botany* 76, 1097-1106 (1989).
- 550 22. P. Catling, V. Catling, Observations of the pollination of *Platanthera huronensis* in  
551 southwest Colorado. *Lindleyana* 4, 78-84 (1989).
- 552 23. J. T. Boland, Memorial University of Newfoundland (1993).
- 553 24. G. R. Smith, G. E. Snow, Pollination ecology of *Platanthera* (*Habenaria*) *ciliaris* and *P.*  
554 *blephariglottis* (Orchidaceae). *Botanical Gazette* 137, 133-140 (1976).
- 555 25. A. E. Colwell, C. J. Sheviak, P. E. Moore, A new *Platanthera* (Orchidaceae) from  
556 Yosemite National Park, California. *Madrone* 54, 86-93 (2007).
- 557 26. J. M. Reddoch, A. H. Reddoch, The orchids in the Ottawa District: floristics,  
558 phytogeography, population studies and historical review. *Canad. Field-Nat* 111, 185p (1997).
- 559 27. A. Gray, Fertilization of orchids through the agency of insects. *Am. J. Sci.* 34, 420-429  
560 (1962).
- 561 28. J. R. Gorham, Orchid pollination by *Aedes* mosquitoes in Alaska. *American Midland*  
562 *Naturalist*, 208-210 (1976).
- 563 29. J. L. Kipping, Pollination studies of native orchids. *Masters Thesis, San Francisco State*  
564 *College*, (1971),69.
- 565 30. J. L. Robertson, R. Wyatt, Reproductive biology of the yellow-fringed orchid, *Platanthera*  
566 *ciliaris*. *American Journal of Botany* 77, 388-398 (1990).
- 567 31. D. Burkhardt, A. Mosandl, Biogenetic studies in *Syringa vulgaris* L.: bioconversion of 18O  
568 (2H)-labeled precursors into lilac aldehydes and lilac alcohols. *Journal of Agricultural and Food*  
569 *Chemistry* 51, 7391-7395 (2003).
